# Rapid Cortical Adaptation and the Role of Thalamic Synchrony During Wakefulness

Nathaniel C. Wright<sup>1</sup>, Peter Y. Borden<sup>1</sup>, Yi Juin Liew<sup>2</sup>, Michael F. Bolus<sup>1</sup>, William M. Stoy<sup>3</sup>, Craig R. Forest<sup>3</sup>, Garrett B. Stanley<sup>1</sup>

<sup>1</sup>Wallace H Coulter Department of Biomedical Engineering, Georgia Institute of Technology and Emory University, Atlanta, GA, USA

<sup>2</sup>Department of Biomedical Engineering, Georgia Institute of Technology, Emory University, Atlanta, GA, USA and Beijing University, Beijing China

<sup>3</sup>Department of Mechanical Engineering, Georgia Institute of Technology, Atlanta, Georgia, USA

Abbreviated Title: Cortical adaptation during wakefulness

With 44 text pages, 8 Figures

**Correspondence:** Garrett B Stanley

Coulter Department of Biomedical Engineering  
Georgia Institute of Technology & Emory University  
313 Ferst Drive  
Atlanta GA 30332-0535  
USA

Phone: 404-385-5037

Fax: 404-385-5044

Email: [garrett.stanley@bme.gatech.edu](mailto:garrett.stanley@bme.gatech.edu)

**Conflict of Interest:** The authors declare no competing financial interests.

**Acknowledgements:** We thank Aurelie Pala, Audrey Sederberg, Adam Willats, Christian Waiblinger, and Elaida Dimwamwa for helpful comments on the data analysis and manuscript. We thank Aurelie Pala for assistance with spike-sorting. **Funding.** This work was supported by NIH National Institute of Neurological Disorders and Stroke Grant R01 NS104928 (GBS), NIH National Institute of Mental Health U01MH106027 (GBS and CRF), NIH National Institute of Neurological Disorders and Stroke Pre-doctoral NRSA NS098691 (PYB), NIH National Eye Institute R01 EY023173 (CRF), and National Science Foundation Graduate Research Fellowships (WMS, MFB).

35 **Abstract**

36

37 Rapid sensory adaptation is observed across all sensory systems, and strongly shapes  
38 sensory percepts in complex sensory environments. Yet despite its ubiquity and likely  
39 necessity for survival, the mechanistic basis is poorly understood. A wide range of studies  
40 primarily in in-vitro and anesthetized preparations have pointed to the emergence of  
41 adaptation effects at the level of primary sensory cortex, with only modest signatures in  
42 earlier stages of processing. The nature of rapid adaptation and how it shapes sensory  
43 representations during wakefulness, and thus the potential role in adaptive changes in  
44 perception, is unknown, as are the mechanisms that underlie this phenomenon. To  
45 address these unknowns, we recorded spiking activity in primary somatosensory cortex  
46 (S1) and the upstream ventral posteromedial (VPm) thalamic nucleus in the vibrissa  
47 pathway of the awake mouse, and quantified responses to whisker stimuli delivered in  
48 isolation and embedded in an adapting sensory background. We found that during  
49 wakefulness, cortical sensory responses were indeed adapted by persistent sensory  
50 stimulation; putative excitatory neurons were profoundly adapted, and inhibitory neurons  
51 only modestly so. Further optogenetic manipulation experiments and network modeling  
52 suggest this largely reflects adaptive changes in synchronous thalamic firing combined  
53 with robust engagement of feedforward inhibition, with little contribution from synaptic  
54 depression. Taken together, these results suggest that cortical adaptation largely reflects  
55 changes in timing of thalamic input, and the way in which this differentially impacts cortical  
56 excitation and feedforward inhibition, pointing to a prominent role of thalamic gating in  
57 rapid adaptation of primary sensory cortex.

58

59

60 **Significance Statement**

61 Rapid adaptation of sensory activity strongly shapes representations of sensory inputs  
62 across all sensory pathways over the timescale of seconds, and has profound effects on  
63 sensory perception. Despite its ubiquity and theoretical role in the efficient encoding of  
64 complex sensory environments, the mechanistic basis is poorly understood, particularly  
65 during wakefulness. In this study in the vibrissa pathway of awake mice, we show that  
66 cortical representations of sensory inputs are strongly shaped by rapid adaptation, and  
67 that this is mediated primarily by adaptive gating of the thalamic inputs to primary sensory  
68 cortex and the differential way in which these inputs engage cortical sub-populations of  
69 neurons.

70

71

72

73 **Introduction**

74

75 Our experience of the world around us depends upon context. For instance, a noisy  
76 sensory environment provides persistent sensory stimulation, which can adaptively shape  
77 the representations of salient sensory features embedded within the environment. Rapid  
78 sensory adaptation describes such interactions between stimulus history and perception,  
79 spanning milliseconds to seconds. A wealth of human psychophysical studies have  
80 documented perceptual adaptation in audition (Bestelmeyer et al., 2010; Erb et al., 2013;  
81 Smith & Faulkner, 2006), vision (Anstis et al., 1998; C. Blakemore & Campbell, 1969;  
82 Colin Blakemore & Nachmias, 1971; Ghodrati et al., 2019), and somatosensation  
83 (Tannan et al., 2007), suggesting rapid sensory adaptation lends a vital flexibility to  
84 organisms tasked with surviving and thriving in the face of rapid environmental changes.

85

86 Despite its ubiquity across sensory systems and likely relevance to function and survival  
87 (Barlow, 1961), the neural basis for rapid sensory adaptation is unknown. A large body  
88 of (mostly in vitro and anesthetized) work has implicated primary sensory cortex in  
89 perceptual adaptation, by showing that persistent stimulation through sensory input or  
90 peripheral electrical stimulation adapts cortical responses in a manner suggestive of well  
91 documented perceptual effects. In the vibrissa pathway of the anesthetized rodent for  
92 example, adaptation induced through persistent whisker stimulation strongly shapes the  
93 amplitude (Cohen-Kashi Malina et al., 2013; Ganmor et al., 2010; Heiss et al., 2008;  
94 Kheradpezhohu et al., 2017; Ollerenshaw et al., 2014; Wang et al., 2010; Zheng et al.,  
95 2015) and spatial extent (Ollerenshaw et al., 2014; Zheng et al., 2015) of cortical  
96 responses to subsequent stimuli, with thalamic activity that serves as the input to S1  
97 exhibiting significantly less adaptation by comparison (Chung et al., 2002; Khatri et al.,  
98 2004). Yet two important questions remain unanswered. First, how does rapid  
99 adaptation shape sensory representations during wakefulness, where baseline levels of  
100 activity are high relative to the anesthetized state (Aasebø et al., 2017; Greenberg et al.,  
101 2008; Vizuete et al., 2012)? It has been suggested that the thalamocortical pathway  
102 during wakefulness is in a baseline “adapted” state that is relatively impervious to  
103 additional adaptation (Castro-Alamancos, 2004), and the neural basis for perceptual  
104 adaptation lies elsewhere, but this has not been rigorously tested. Second, if indeed the  
105 circuit is subject to sensory adaptation during wakefulness, what are the underlying  
106 mechanisms? Although previous anesthetized and in-vitro work implicates  
107 thalamocortical and/or intracortical synaptic depression (Castro-Alamancos & Oldford,  
108 2002; Chung et al., 2002; Cohen-Kashi Malina et al., 2013; Cruikshank et al., 2007, 2010;  
109 Gabernet et al., 2005), adaptation effects on thalamic properties such as population  
110 synchrony (Ollerenshaw et al., 2014; Wang et al., 2010) and single-unit bursting  
111 (Whitmire et al., 2016b) observed under anesthesia suggest a potential role for thalamus  
112 in shaping the adapted cortical response, given the high sensitivity of cortex to the timing

113 of thalamic inputs (Bruno & Sakmann, 2006; Ollerenshaw et al., 2014; Swadlow & Gusev,  
114 2001; Wang et al., 2010).

115

116 Here, we address these unknowns by recording from and modeling the primary  
117 somatosensory (S1) cortex of the awake, head-fixed mouse during rapid sensory  
118 adaptation. We found that despite the relatively high level of baseline activity typical of  
119 the awake state, putative excitatory neurons in S1 were profoundly adapted by a  
120 background sensory adapting stimulus. In particular, mean evoked firing rates,  
121 theoretical stimulus detectability, and synchronous cortical spiking were all significantly  
122 reduced in the adapted state, consistent with previously-reported decreases in detection  
123 performance. Several lines of evidence – including the recording of the thalamic inputs  
124 under a range of optogenetic controls and computational modeling – suggest this  
125 primarily reflected reduced synchronous thalamic firing and robust thalamically-driven  
126 feedforward inhibition in the adapted condition, with little contribution from thalamocortical  
127 and intracortical synaptic depression. Taken together, the results here establish the role  
128 of the thalamocortical circuit in rapid adaptation during wakefulness, and implicate a more  
129 critical role of thalamic input than previously thought.

130

131

132 ***Materials and Methods***

133

134 All procedures were approved by the Institutional Animal Care and Use Committee at the  
135 Georgia Institute of Technology (Protocol Numbers A100223 and A100225), and were in  
136 agreement with guidelines established by the National Institutes of Health.

137

138 *Surgery*

139 Mice were induced with 5% isoflurane in an induction chamber, then transferred to a  
140 heating pad on a stereotaxic instrument, and maintained at 1 - 2% isoflurane for the  
141 remainder of the surgical procedure. A custom stainless steel headplate was fixed to the  
142 exposed skull with Metabond dental cement (Parkell, Inc.), exposed bone and tissue were  
143 then sealed with Metabond and super-glue (Loctite 404; Henkel). Metabond was used to  
144 fashion a well surrounding the left hemisphere. The well was filled with Kwik-Cast (World  
145 Precision Instruments, Inc.) and covered with a thin layer of Metabond, and the mouse  
146 was returned to its home cage. Mice were given pre- (buprenorphine) and post-operative  
147 (ketoprofen) analgesic, and were allowed to recover for three days before additional  
148 handling.

149

150 *Habituation*

151 Three days after headplate implantation, mice were handled for at least 15 minutes, and  
152 then returned to their home cage. On subsequent days, mice were gradually habituated  
153 to head-fixation on a custom platform consisting of a tunnel with headpost clamps at one  
154 end. The first three daily habituation sessions lasted 15, 30, and 45 minutes respectively,  
155 but mice were returned to their home cage if they displayed signs of distress. We then  
156 gradually extended session durations until mice would tolerate at least 1.5 hours of  
157 fixation and whisker stimulation without signs of distress. Mice that did not meet these  
158 criteria were removed from the study, or used for anesthetized recordings (see below).

159

160 *Awake electrophysiological recordings*

161 We recorded from five Ai32 x nsmf-cre, four C57BL/6J (wild-type) and one Ai32xPV-cre  
162 awake mice (up to three awake sessions per mouse). We used intrinsic optical signal  
163 imaging acquired under anesthesia to identify at least one putative principal column in  
164 S1. On the morning of the first recording session for each animal, we anesthetized the  
165 mouse as described above, and opened an approximately 500 micron x 500 micron  
166 craniotomy centered over a putative cortical column. When acquiring simultaneous VPM

167 and S1 recordings, we opened a second craniotomy of similar size over the stereotactic  
168 coordinates for VPM (1.8mm lateral from midline by 1.8mm caudal from bregma) and  
169 slowly inserted either a single-channel tungsten electrode (2 MOhm, FHC) or 32-channel  
170 silicon probe (NeuroNexus A1x32-Poly3-5mm-25s-177) to a depth of approximately 3  
171 mm. We adjusted the depth while presenting continuous 10 Hz “sawtooth” stimulus trains  
172 to individual whiskers until we could identify a putative principal barreloid (by observing  
173 broad-waveform units with robust, short-latency, minimally-adapting sensory responses  
174 to stimulation of a single whisker, and at most comparatively weak responses to  
175 stimulation of surrounding whiskers (Brecht & Sakmann, 2002)), before slowly retracting  
176 the electrode/probe. We then covered exposed brain tissue with agarose, filled the well  
177 with Kwik-Cast, and allowed the mouse to recover in its home cage for at least two  
178 hours. After recovery, we head-fixed the awake mouse, removed the Kwik-Cast, filled  
179 the well with either saline, mineral oil, or agarose, and inserted an electrode/probe into  
180 each open craniotomy using a Luigs and Neumann manipulator. For S1 recordings, we  
181 inserted a multi-channel silicon probe (NeuroNexus) oriented 35 degrees from vertical.  
182 We used either a 32-channel linear (A1x32-5mm-25-177-A32), 32-channel “Poly3”  
183 (A1x32-Poly3-5mm-25s-177), or 64-channel, four-shank “Poly2” (A4x16-Poly2-5mm-  
184 23s-200-177) configuration probe. For VPM recordings, we inserted either a tungsten  
185 optoelectrode (2 Megaohm, FHC, with attached 200 micron optic fiber, Thorlabs), 32-  
186 channel silicon probe (A1x32-Poly3-5mm-25s-177) or 32-channel silicon optoelectrode  
187 (A1x32-Poly3-5mm-25s-177-OA32LP, with attached 105 micron optic fiber coupled to a  
188 200 micron optic fiber, Thorlabs). Optic fibers were coupled to a 470 nm LED (M470F3,  
189 Thorlabs). When the barreloid we functionally identified during the anesthetized VPM  
190 mapping session was not topographically-aligned with the targeted S1 column, we  
191 referenced the (Coronal) Allen Brain Atlas to adjust the positioning of the VPM probe  
192 before descending. We inserted the probe(s) slowly to avoid excessive tissue dimpling,  
193 and waited at least 30 minutes after probe insertion to begin recording, to allow the tissue  
194 to settle. Continuous signals were acquired using either a Cerebus (Blackrock  
195 Microsystems) or Tucker Davis Technologies acquisition system. Signals were amplified,  
196 filtered between 0.3 Hz and 7.5 kHz and digitized at either 30 kHz or 24414.0625 Hz.

197 After the first recording session, we removed the probe(s), covered exposed tissue with  
198 agarose, and sealed the well with Kwik-Cast and a thin layer of Metabond. We obtained  
199 either two or three recording sessions (one per day) from each mouse using the original  
200 craniotomy, but each time targeting a different cortical column and barreloid.

201

### 202 *Anesthetized extracellular recordings*

203 We recorded from three C57BL/6J (wild-type), four Ai32xPV-Cre, and three Ai32xnsmf  
204 mice under isoflurane anesthesia. Mice were anesthetized and implanted with



205 headplates, and we opened a single craniotomy (either approximately 500 microns x 500  
206 microns, or 1 mm x 1 mm) over S1, as described above. In some cases, the principal  
207 column was first identified using intrinsic optical signal imaging, as described above. In  
208 other cases, we inserted a single tungsten electrode into the stereotactic coordinates for  
209 the center of S1, and defined the putative principal whisker to be that which evoked the  
210 largest LFP response. We then inserted a 4 x 16 silicon probe array (A4x16-Poly2-5mm-  
211 23s-200-177) to a depth of 700 microns. We oriented the probe to avoid blood vessels  
212 on the cortical surface. For a subset of these experiments, we obtained additional  
213 sessions by repeating the stimulation protocol using the whisker that evoked the  
214 maximum LFP response on a shank different from the first. For each such session, we  
215 determined the putative principal column off-line using white-noise-evoked spiking. For  
216 each shank, we summed single- and multi-unit (see below) spiking across all trials for the  
217 1 s window preceding feature onset. We divided the across-trial mean white-noise-  
218 evoked response by the across-trial standard deviation of spontaneous spiking, and the  
219 shank with the largest resulting value was determined to correspond to the principal  
220 column.

221

#### 222 *Anesthetized intracellular recordings*

223 We recorded ongoing, sensory-evoked, and light-evoked subthreshold activity from four  
224 sensory- and light-responsive neurons in two mice using an Autopatcher system  
225 (Kodandaramaiah et al., 2016), as described in detail previously (Stoy et al.,  
226 2020). Briefly, we head-plated and identified the putative C2 column using intrinsic optical  
227 signal imaging in two isoflurane-anesthetized Ai32 x NR133 transgenic mice, and opened  
228 a 1 mm x 1 mm craniotomy over the column, as described above. We then used an  
229 Autopatcher 1500 (Neuromatic Devices) to provide pressure and measure pipette  
230 resistance, and an algorithm based on these measurements to navigate around blood  
231 vessels in an automated fashion while the pipette descended through cortical tissue.  
232 Finally, we applied a recently-developed automated motion-compensation procedure  
233 (Stoy et al., 2020) for synchronizing the motion of the pipette tip to that of the targeted  
234 neuron prior to forming the seal. These experiments utilized Multiclamp 700B amplifiers  
235 (Molecular Devices), and signals were digitized at 20 kHz (cDAQ-9174, National  
236 Instruments), and recorded in PClamp 10 in current-clamp mode.

237

#### 238 *Whisker stimulation*

239 We used a precise, computer-controlled galvanometer (Cambridge Technologies) with  
240 attached tube to stimulate individual whiskers (Sederberg et al., 2018; Whitmire et al.,  
241 2016b). The galvanometer was controlled using either a custom Matlab GUI and Simulink

242 Real-Time (Mathworks), or the Real-time eXperiment Interface application (<http://rtxi.org/>,  
243 CITE), sampling at 1 kHz. We inserted the whisker into the tube, which was positioned  
244 approximately 10 mm from the whisker pad. We delivered “sawtooth” stimulus features  
245 (exponential rise and decay waveforms lasting approximately 17 ms, with reported  
246 velocity defined by the average over the 8.5 ms rising phase (Wang et al., 2010)) either  
247 in isolation, or embedded in frozen sensory white noise (i.e., white noise waveforms that  
248 were identical across trials). To generate the white noise waveforms, the value at each  
249 time-step was drawn from a Gaussian distribution, and the resulting signal was lowpass-  
250 filtered at 100 Hz (3rd-order Butterworth (Waiblinger et al., 2015)). The reported  
251 amplitude of the white noise stimulus is the standard deviation of the Gaussian  
252 distribution. The white noise waveform around the feature waveform was dampened with  
253 an inverted Gaussian, with standard deviation 25.5 ms, or twice the duration of the  
254 sawtooth waveform.

255 The stimulus conditions were randomized across trials. The stimulus consisted of 1.5 s  
256 of either white noise (“adapted” trials) or no white noise (“control” trials), with the onset of  
257 the embedded feature at 1 s. The inter-trial interval was a random value (drawn from a  
258 uniform distribution) between 2 and 3 s. We typically obtained at least 100 trials per  
259 stimulus condition.

260

### 261 *Optogenetic stimulation*

262 In a subset of acute anesthetized experiments in Ai32 x NR133 transgenic mice, we  
263 stimulated thalamocortical terminals in S1 using blue (470 nm) light from an LED  
264 (ThorLabs), and recorded either spiking or subthreshold S1 responses. We positioned  
265 either a 200 or 400 micron optic fiber (ThorLabs) just above the exposed cortical surface,  
266 adjacent to the probe or patch pipette. Light pulses were either 10 ms or 15 ms in  
267 duration, and were delivered either in isolation or embedded in sensory white noise  
268 delivered to the whisker by the galvanometer. We titrated the light level at the beginning  
269 of each recording session to evoke cortical responses that were comparable in amplitude  
270 to those evoked by punctate whisker stimulation.

271 In a subset of awake experiments in Ai32 x NR133 transgenic mice, we presented the  
272 above sensory stimulus protocol, in addition to a set of “LED” trials in which we delivered  
273 a step input of 470 nm light to VPm beginning 1 s before and ending 0.5 s after the delivery  
274 of an isolated sawtooth whisker stimulus. The light was delivered via LED-coupled fiber  
275 attached to the electrode/probe (described above). We titrated the light level at the  
276 beginning of each recording session such that steady-state light-evoked firing rates in  
277 VPm (based on threshold crossings of high-pass-filtered voltage recordings)  
278 approximately matched those evoked by the white noise whisker stimulus.



279

## 280 *Spike-sorting*

281 We sorted spikes off-line using KiloSort2 (<https://github.com/MouseLand/Kilosort2>) for  
282 clustering, and phy (<https://github.com/cortex-lab/phy>) for manual curation of clusters.  
283 During manual curation, clusters were either merged or separated based primarily on  
284 waveform distributions across the probe and cross-correlogram structure. We discarded  
285 as “noise” those clusters whose across-instance mean waveform did not resemble a  
286 characteristic spike on any channel. All remaining clusters were labeled as either single-  
287 or multi-units by downstream analysis (see below).

288

## 289 *Units retained for analysis*

290 We labeled each curated cluster as either a single- or multi-unit based on the signal-to-  
291 noise ratio (SNR) and inter-spike interval (ISI) distribution. For each cluster and recorded  
292 spike, we calculated the absolute voltage difference between the trough and subsequent  
293 peak (VTP) on each channel. We defined the SNR to be the across-trial mean VTP  
294 divided by the across-trial standard deviation, for the channel on which the mean VTP  
295 was greatest. Additionally, we calculated “ISI violation percentage” for each cluster using  
296 the autocorrelogram (ACG). We defined the violation percentage to be the percentage  
297 of spikes in the 0 - 1 ms ACG bin. We then defined a well-isolated single-unit to be a  
298 cluster with SNR greater than 4.0, and ISI violation percentage below 1%. All other  
299 clusters were classified as multi-units. In our anesthetized recording sessions, we used  
300 an alternate probe configuration, which was somewhat less well-suited to obtaining well-  
301 isolated units. We therefore slightly relaxed our inter-spike interval violation constraints  
302 for defining “well-isolated” units, to yield more RS and FS cells from these datasets (see  
303 Methods). This did not qualitatively change our results. For S1, we further segregated  
304 single-units into regular- and fast-spiking units based on the mean waveform. Again using  
305 the channel on which the waveform was largest, we calculated the time from trough to  
306 subsequent peak (TTP). We classified S1 units with  $TTP < 0.4$  ms to be fast-spiking  
307 units, and all others to be regular-spiking (CITE). Waveforms were in general narrower  
308 for VPM units, consistent with previous work (Barthó et al., 2014). We therefore classified  
309 VPM “RS” cells as those with  $TTP > 0.3$  ms, and excluded units with narrower waveforms,  
310 which likely originated from either the cell bodies or axon terminals of neurons in reticular  
311 thalamus (Barthó et al., 2014). For putative VPM units, we further required that the  
312 absolute peak of the PSTH of responses to isolated punctate stimuli occur between 2 and  
313 10 ms of stimulus onset. Finally, when analyzing activity of single- and/or multi-units, we  
314 only included those units with at least 0.25 mean post-stimulus spikes per trial, and a  
315 significant change ( $p < 0.05$ , Wilcoxon signed-rank test) in firing rate after stimulus onset

316 on control (unadapted) trials, using the weakest sawtooth stimulus delivered during that  
317 recording session and 50 ms (30 ms) pre- and post-stimulus windows for S1 (VPm).  
318

### 319 *Experimental Design and Statistical Analyses*

320 When comparing two sets of values (that were matched samples) across stimulus  
321 conditions, we used the Wilcoxon signed-rank test (implemented in Python using the  
322 wilcoxon function in the Scipy library), and Bonferroni-corrected resulting p-values for  
323 multiple comparisons where applicable. When comparing two independent samples  
324 (e.g., normalized response rates for RS and FS cells), we used the Kruskal-Wallis test  
325 (implemented in Python using the kruskal function in the Scipy library).

326 For any analysis resulting in a single value for a given recording session calculated using  
327 all trials (e.g., AUROC, mean synchronous spike rates, etc.), we tested for significance of  
328 change across conditions by re-sampling trials with replacement, re-calculating the final  
329 value for the re-sampled pseudo-data, and calculating the 95% confidence intervals  
330 (Bonferroni-corrected if necessary) of the resulting distribution of values.

331 The number of cells and animals used to calculate each reported result is included in the  
332 text of the Results section and/or figure captions.

333

### 334 *Analyses*

335 All analyses were performed using custom scripts in Python 3.0. The details of each  
336 analysis are presented below.

337

### 338 *ROC analysis*

339 We calculated the theoretical detectability of sawtooth sensory features for each  
340 recording session by applying ideal observer analysis (Ollerenshaw et al., 2014; Wang et  
341 al., 2010) to the “population response” distributions for ongoing and feature-evoked  
342 activity. First, for each trial, we summed the ongoing and evoked spike counts across all  
343 RS and multi-units. For visualization, we then “z-scored” these population results by  
344 dividing the value for each trial by the across-trial standard deviation of ongoing activity  
345 for the unadapted condition. This re-scaling gives an intuitive sense of a single-trial  
346 response “amplitude” (as a multiple of baseline activity), but does not affect the  
347 detectability calculation. Next, for each stimulus condition, we calculated the across-trial  
348 mean and standard deviation of the z-scored spike counts, and generated a population  
349 response distribution by drawing 1000 samples from a gamma distribution parameterized  
350 by these values (Wang et al., 2010). For each punctate stimulus velocity, we calculated

351 the true- and false-positive rates for each threshold value between 0 and the maximum  
352 response amplitude, using steps of two standard deviations. We then generated the  
353 receiver operator characteristic (ROC) curve by plotting the set of true-positive values vs.  
354 the false-positive values. Finally, we quantified the theoretical detectability as the area  
355 under the ROC curve (AUROC). The trend in across-population mean AUROC was  
356 qualitatively unchanged when we used recorded population responses rather than  
357 parametrized gamma distributions.

358

### 359 *Synchrony analysis*

360 We calculated the population synchrony of feature responses for each recording session  
361 using the population grand cross-correlogram (CCG) of single- and multi-unit  
362 spiking. First, for each trial, unit, and spike, we calculated the relative time of all spikes  
363 from other simultaneously-recorded units in a +/- 20 ms window. We repeated this for all  
364 spikes, units, and trials, populating the grand CCG. We defined the population synchrony  
365 to be the proportion of spikes in the CCG in the +/- 7.5 ms window (Wang et al., 2010).

366

### 367 *Tonic and burst VPM spikes*

368 We classified spikes from well-isolated units in putative VPM as either burst or tonic based  
369 on criteria described previously (Whitmire et al., 2016b). Bursts consisted of two or more  
370 sequential spikes from a single unit. We required at least 100 ms of quiescence before  
371 the first spike in the burst. Subsequent spikes were included in the burst if they occurred  
372 at most 4 ms after the previous spike. These criteria are consistent with the timing of  
373 burst spikes resulting from de-inactivation of T-type calcium channels after prolonged  
374 hyperpolarization.

375

### 376 *S1 membrane potential analysis*

377 We removed action potentials from intracellular voltage recordings by first identifying  
378 spike times and interpolating between the values 2.5 ms before and 2.5 ms after the peak  
379 of the action potential. To identify spike times in each recording, we first calculated the  
380 first time derivative time of the membrane potential at each time step. Spike onsets were  
381 defined to be positive crossings of five standard deviations of this time series. For each  
382 onset, the spike peak time corresponded to the next time at which the time derivative was  
383 less than or equal to zero. After interpolation, we low-pass-filtered the resulting time  
384 series (100 Hz, 3<sup>rd</sup> order Butterworth). For sawtooth sensory and optogenetic terminal  
385 stimulation responses, we calculated the across trial mean subthreshold response

386 amplitude, time-to-peak, and width, using the same method as described above for the  
387 LFP.

### 388 *Thalamocortical network model*

389 We constructed a simple model of the thalamocortical network using custom scripts  
390 written in Python 3.6.10. All code is freely available upon request. We modeled a single  
391 cortical barrel as a clustered network of excitatory and inhibitory single-compartment  
392 leaky integrate-and-fire (LIF) neurons, subject to excitatory synaptic inputs from a  
393 “barreloid” of VPM neurons, and well as excitatory non-thalamic inputs that were  
394 independent across cortical neurons. For each of the “control” and “adapted” conditions,  
395 we simulated 50 trials, each lasting 150 ms, with a time-step of 0.05 ms.

396 We modeled a single VPM barreloid as forty independent trains of tonic and burst spikes,  
397 drawn from the empirical VPM PSTHs. The ongoing and evoked rates for each neuron  
398 were drawn from a skewed gamma distribution, to mimic the broad firing rate distributions  
399 of VPM neurons previously reported (Bruno & Simons, 2002; D. J. D. Pinto et al., 2000;  
400 Wang et al., 2010; Whitmire et al., 2016b). Bursts were modeled as pairs of spikes with  
401 2.5 ms ISI.

402 Non-zero thalamocortical (TC) synaptic weights were drawn from a broad distribution, to  
403 mimic the reported variability in TC synaptic strengths and/or efficacies (Bruno &  
404 Sakmann, 2006; Bruno & Simons, 2002; Cruikshank et al., 2007, 2010; Gabernet et al.,  
405 2005; Sermet et al., 2019). Mean initial TC synaptic strengths were the same for  
406 excitatory and inhibitory neurons (Sermet et al., 2019), but TC convergence was higher  
407 for inhibitory neurons (75% for inhibitories, 50% for excitatories), and VPM neurons with  
408 the highest firing rates did not synapse onto excitatories (Bruno & Simons, 2002). In  
409 response to a spike in a given thalamic neuron, all TC synapses from that neuron instantly  
410 decayed (by a factor of 0.75), followed by exponential recovery (with time constant 25  
411 ms).

412 We modeled a single cortical column as a network of 800 excitatory and 100 inhibitory  
413 LIF neurons, with relatively strong inhibitory-to-excitatory synapses (Gabernet et al.,  
414 2005). We imposed spatial clustering via “small-world” network connectivity (Bujan et al.,  
415 2015; Litwin-Kumar & Doiron, 2012; Wright, Hoseini, & Wessel, 2017; Wright, Hoseini,  
416 Yasar, et al., 2017), with 10% re-wiring probability. Inhibitory LIF neurons had shorter  
417 membrane time constants (Gentet et al., 2010) and refractory periods (1 ms for inhibitory,  
418 2 ms for excitatory), which – together with the TC connection properties described above  
419 – supported higher firing rates in inhibitory neurons, as observed here during wakefulness  
420 (Fig. 1D – F) and in previous work (Bruno & Simons, 2002; Gentet et al., 2010; Khatri et  
421 al., 2004; Taub et al., 2013). Excitatory neurons were subject to an inhibitory spike-rate  
422 adaptation conductance, which helped to stabilize network activity.

423 We quantified model responses by calculating the peaks of the grand PSTHs for  
424 excitatory and inhibitory LIF neurons and divided “adapted” values by “control” values,  
425 yielding the normalized adapted response. We generated grand cross-correlograms (as  
426 described above) for 200 randomly-selected excitatory-excitatory and inhibitory-inhibitory  
427 pairs, and for 100 VPM-VPM pairs.

428 We further employed two alternate models to parse the roles played by synchronous  
429 thalamic spikes and feedforward inhibition. For the “reduced synch” model, we  
430 maintained the mean spike rates of the original model, but manually adjusted drawn VPM  
431 spike times to reduce synchrony. Specifically, if a drawn VPM spike time was within +/-  
432 5 ms of the empirical PSTH peak time, we shifted the spike to a random later time, within  
433 approximately 20 ms of the PSTH peak. For the “Identical TC Connectivity” model,  
434 excitatory and inhibitory neurons had the same TC convergence values (50%), and we  
435 did not require that VPM neurons with the highest rates synapse exclusively onto  
436 inhibitory neurons.

437

438 **Results**

439

440 To investigate the adaptive effects of persistent sensory stimulation on S1 sensory  
441 responses during wakefulness, we presented precise deflections to a single whisker of  
442 the awake, head-fixed mouse using a computer controlled galvanometer, and recorded  
443 extracellular spiking activity in the corresponding principal column of S1, and/or principal  
444 barreloid of VPM. (Fig. 1A, see Methods). We presented punctate “sawtooth” whisker  
445 deflections either in isolation or embedded in an adapting background stimulus (frozen  
446 sensory white noise, Fig. 1A). The punctate stimuli capture the basic nature of the high  
447 velocity “stick-slip” whisker motion events that occur as a result of whisker contacts with  
448 larger surface irregularities during active sensation (Jadhav et al., 2009; Jadhav &  
449 Feldman, 2010; Ritt et al., 2008; Wolfe et al., 2008). During whisker contacts with  
450 surfaces, these stick-slip events are embedded in patterns of smaller-amplitude, irregular  
451 deflections (Jadhav & Feldman, 2010), simplistically captured here utilizing low-  
452 amplitude, repeatable white noise whisker stimulation (Waiblinger et al., 2015; Whitmire  
453 et al., 2016b). We first characterized the effects of the background stimulus on baseline  
454 and sawtooth-evoked cortical firing during wakefulness (Figs. 1 – 3), and then sought to  
455 identify the mechanisms underlying these effects through a battery of additional  
456 experiments (Figs. 4 – 7) and thalamocortical network modeling (Fig. 8).

457

458 **S1 exhibits profound and differential sensory adaptation during wakefulness.**

459

460 Before directly assessing the adaptive effects of the background stimulus, we  
461 characterized its effects on the rate and timing of baseline spiking activity in S1. We  
462 segregated well-isolated, sensory-responsive cortical units into regular-spiking (RS,  
463 putative excitatory) and fast-spiking (FS, putative inhibitory) neurons (Fig. 1B, see  
464 Methods). Sensory white noise noticeably elevated spiking activity in S1 in the form of  
465 stimulus-locked spiking, particularly among FS cells (Fig. 1C, D). We compared firing  
466 rates during presentation of the background stimulus to those during spontaneous activity  
467 (i.e., in the absence of stimulus delivery). We found that the stimulus significantly  
468 elevated the firing rates of both RS and FS units, with a more pronounced effect on FS  
469 rates (Fig. 1D). This differential effect is consistent with previous work demonstrating  
470 the higher sensitivity of S1 FS cells to relatively weak re-afferent excitatory drive during  
471 whisking (Gutnisky et al., 2017; Yu et al., 2016, 2019).

472

473 Next, we next investigated the adaptive effects of the background stimulus during  
474 wakefulness. To this end, we delivered 300 deg/s “sawtooth” punctate deflections to a  
475 single whisker, either in isolation (the “control” condition), or following 1 s of background  
476 stimulation (the “adapted” condition, Fig. 1A, see Methods). To investigate the relevance  
477 of adaptation across a range of punctate stimulus strengths, we delivered both moderate



478 (300 deg/s) and relatively strong (900 deg/s) punctate stimuli in a subset of experiments.  
479 To avoid distortion of the punctate stimulus waveform, the background sensory white  
480 noise was dampened with an inverted Gaussian waveform in the neighborhood of the  
481 punctate stimulus (Waiblinger et al. 2015; Whitmire et al. 2016; see Methods). In the  
482 control condition, punctate deflections of both velocities evoked robust, short-latency  
483 spiking responses, (Fig. 1E), consistent with previous work in the anesthetized (Bruno &  
484 Simons, 2002; Khatri et al., 2004; D. J. Pinto et al., 2003; Wang et al., 2010) and awake  
485 (Musall et al., 2014) rodent. We next asked whether the background stimulus appreciably  
486 adapted punctate stimulus responses, or whether the relatively high baseline firing rates  
487 during wakefulness (Fig. 1D) resulted in a “pre-adapted” circuit (Castro-Alamancos,  
488 2004). We found that S1 responses were in fact substantially muted when punctate  
489 stimuli were embedded in the background stimulus (Fig. 1E). To characterize RS and FS  
490 sensory responses and the effects of adaptation, we calculated across-trial mean evoked  
491 rates using a 50 ms window following punctate stimulus onset. For both cell types and  
492 punctate stimulus strengths, the peak (Fig. 1E) and mean (Fig. 1F) evoked rates were  
493 reduced in the adapted condition. Interestingly, adaptation appeared to be more profound  
494 for RS cells, in terms of proportional changes in sensory responses (Fig. 1E, F). To  
495 further quantify the effects of adaptation on a cell-by-cell basis, and to capture cell-type-  
496 specific adaptation, we calculated the normalized adapted response for each cell (i.e., the  
497 across-trial mean adapted response rate divided by the mean control rate, see Methods).  
498 For both punctate stimulus strengths and cell types, population median normalized  
499 adapted responses were less than one (capturing the general adaptive reduction in  
500 evoked rate), and RS cells were indeed significantly more adapted than FS cells (Fig.  
501 1G). This differential effect was not specific to any cortical depth (Fig. 1H).

502

503 In summary, rapid sensory adaptation was observed in S1 of the awake mouse, and  
504 cortical putative excitatory neurons were more adapted than inhibitory neurons.

505

### 506 **Adaptation reduces the theoretical detectability of punctate sensory stimuli.**

507

508 We next addressed the potential implications of this response adaptation for the  
509 detectability of the punctate stimulus. To do so, we adopted a signal detection theory  
510 framework (Fig. 2A) to calculate the theoretical detectability of the stimulus in the control  
511 and adapted conditions. Qualitatively, the theoretical detectability of the stimulus is  
512 inversely related to the degree of overlap between the ongoing (“no-stim”) and evoked  
513 (“stim”) distributions (Fig. 2A, right). For each recording session, we generated ongoing  
514 and evoked population spiking distributions using the summed RS and multi-unit spike  
515 counts for each trial (Fig. 2B, see Methods). For this analysis, we excluded putative  
516 inhibitory neurons, as we were interested in interpreting the loss of excitatory drive from  
517 cortical neurons. We included multi-units to yield better-populated response distributions.

518 While this likely introduced contributions from inhibitory neurons, this would tend to  
519 diminish the effects of adaptation on theoretical detectability, as FS units were less  
520 profoundly adapted (Fig. 1). Consistent with the overall adaptive decrease in single-  
521 neuron response rates (Fig. 1F), adaptation tended to move the evoked distribution  
522 toward the ongoing distribution, increasing the degree of overlap (Fig. 2B, right). We  
523 quantified the overlap by calculating the area under the receiver operator characteristic  
524 curve (Wang et al., 2010; Whitmire et al., 2016b) (AUROC, Fig. 2C), which has a value  
525 of 1.0 for non-overlapping distributions, and 0.5 for complete overlap. According to this  
526 measure, sensory white noise reduced the across-session mean detectability of the  
527 sawtooth stimulus by 16.3% (Fig. 2D, bottom). Thus, adaptation significantly reduced the  
528 theoretical detectability of punctate whisker stimuli, consistent with previous recordings in  
529 S1 of the anesthetized rat (Ollerenshaw et al., 2014; Wang et al., 2010; Zheng et al.,  
530 2015), and adaptive changes in behavior in awake rats (Ollerenshaw et al., 2014).

531

### 532 **Adaptation increases the latency of and reduces synchronous spiking in S1** 533 **sensory responses**

534

535 Besides the adaptation of mean evoked rates (Fig. 1F, G), visual inspection of the grand  
536 PSTHs (Fig. 1E) suggests an apparent increase in the latency of responses in the  
537 adapted condition, as well as a dramatic reduction in evoked rates in the early response  
538 (particularly among RS cells). These phenomena may be relevant for interpreting the  
539 mechanistic basis of S1 adaptation, and the likely perceptual implications; both are  
540 consistent with weaker feedforward excitatory drive to S1, and the latter could impair the  
541 ability of S1 RS cells to drive downstream targets. We therefore sought to quantify these  
542 adaptive effects and began by calculating response latency on a cell-by-cell basis.  
543 However, in contrast to the relatively well-populated grand PSTHs (Fig. 2C), the sparsely-  
544 populated PSTHs of individual neurons confound response onset calculations (Fig. 3A,  
545 left). As such, we convolved the spike trains of each neuron with a Gaussian kernel,  
546 yielding a convolved aggregate spike count time series ( $\tilde{s}$ , Fig. 3A, right, see Methods),  
547 or a smoothed PSTH. We defined the response onset ( $T_{\text{onset}}$ ) for each stimulus condition  
548 to be the time at which  $\tilde{s}$  exceeded four standard deviations of the pre-stimulus values  
549 (calculated from control trials). We found that for both RS and FS cells, and for both  
550 stimulus strengths, adaptation increased  $T_{\text{onset}}$  values (Fig. 3B). To further quantify and  
551 compare adaptive changes in  $T_{\text{onset}}$  across cell types, we calculated the  $T_{\text{onset}}$  adaptation  
552 index for each cell (see Methods) and compared population medians for RS and FS cells.  
553 For both stimulus strengths, the adaptive increase in response onset times was  
554 significantly greater for RS cells (300 deg/s RS median  $T_{\text{onset}}$  AI = 0.21, FS median  $T_{\text{onset}}$   
555 AI = 0.02,  $p = 1.21 \times 10^{-4}$ , Kruskal-Wallis test; 900 deg/s RS median  $T_{\text{onset}}$  AI = 0.13, FS  
556 median  $T_{\text{onset}}$  AI = 0.00,  $p = 4.93 \times 10^{-4}$ ).

557

558 Next, we reasoned that the profound loss of evoked spikes in the early adapted S1  
559 response (Fig. 1E) might reflect a decrease in synchronous spiking among cortical  
560 neurons. In general, the degree of synchronous firing among a population of neurons is  
561 likely related to the effect on synaptic targets; stronger inhibitory synchrony will tend to  
562 silence postsynaptic neurons, and stronger excitatory synchrony will be more efficacious  
563 for postsynaptic neurons – possibly downstream from S1. Indeed, it has been shown that  
564 coordinated population firing is a better predictor than mean rates of stimulus identity  
565 (Jadhav et al., 2009; Safaai et al., 2013; Zuo et al., 2015) and behavioral stimulus  
566 discrimination performance (Safaai et al., 2013; Zuo et al., 2015) when rodents whisk  
567 across textured surfaces.

568  
569 To calculate the prevalence of synchronous spikes, we populated the grand cross-  
570 correlogram (CCG) for RS-RS and FS-FS pairs for each stimulus condition using spike  
571 trains from all pairs of simultaneously-recorded responsive cells, and defined  
572 synchronous spikes to be those within a +/- 7.5 ms window around zero lag (Fig. 3C, see  
573 Methods, Wang et al. 2010). We found that adaptation drastically reduced the amplitude  
574 and sharpness of the RS-RS CCGs (Fig. 3D), while more modestly reducing the grand  
575 CCG amplitude for FS-FS pairs (Fig. 3E). This represented a significant decrease in  
576 synchronous spike counts for both pair types and stimulus velocities (Fig. 3G, see  
577 Methods for definition of “valid pairs”). As reflected in the grand CCGs, the decrease in  
578 FS-FS synchrony was significant, but proportionally smaller than that of RS-RS synchrony  
579 (compare Figs. 3F and 3G).

580  
581 Thus, rapid sensory adaptation in S1 during wakefulness not only altered mean evoked  
582 spike rates (Fig. 1), and theoretical stimulus detectability (Fig. 2), but also response  
583 latencies and the prevalence of synchronous cortical spiking. In both cases, as with mean  
584 evoked rates (Fig. 1G), the adaptive effect on RS cells was more dramatic. The loss of  
585 synchronous excitatory firing has implications for the driving of targets downstream of S1,  
586 and ultimately for perception and behavior. The more modest decrease in synchronous  
587 inhibitory firing implies that inhibitory neurons were still relatively strongly driven in the  
588 adapted condition. Further, the synchronous inhibitory spiking that survives adaptation  
589 should provide robust feedforward inhibition to S1 excitatory neurons, which may in part  
590 explain the more profound adaptation of RS cells.

591  
592 **S1 sensory responses are also adapted under anesthesia, but RS cells are not**  
593 **differentially adapted**

594  
595 Having established the existence and characteristics of rapid sensory adaptation in S1 of  
596 the awake mouse (Figs. 1 – 3), we next turned our attention to the underlying  
597 mechanisms. Our first step in doing so was to compare these results to those from the

598 anesthetized mouse, for two reasons. First, while the background stimulus elevated S1  
599 firing rates at least in part via feedforward sensory inputs (as evidenced by the degree of  
600 stimulus-locked firing, Fig. 1), it is still possible that this adapting stimulus also evoked  
601 top-down modulation, e.g., via systematic changes in ongoing S1 state via arousal-  
602 related, brainstem-mediated neuromodulation (Mcginley et al., 2015; McGinley et al.,  
603 2015; Reimer et al., 2014, 2016) and/or inputs from secondary motor area (Manita et al.,  
604 2015). In the anesthetized mouse, ongoing state changes caused by endogenous  
605 processes should be independent of the sensory white noise, and as such, white-noise-  
606 induced changes in mean punctate stimulus representations should not reflect top-down  
607 mechanisms. Second, isoflurane anesthesia tends to silence the secondary  
608 posteromedial nucleus of thalamus (Suzuki & Larkum, 2020), lowers baseline cortical  
609 firing rates (Aasebø et al., 2017; Greenberg et al., 2008; Vizuete et al., 2012), and  
610 generally weakens cortical inhibition (Haider et al., 2013) and other intracortical  
611 interactions (Suzuki & Larkum, 2020). We therefore repeated our experiments in a  
612 different set of mice lightly-anesthetized with isoflurane, using the anesthesia to unmask  
613 the feedforward inputs from VPM to S1.

614  
615 As expected, baseline firing rates under anesthesia were quite low compared to those  
616 recorded during wakefulness (Fig. 4B, C). Despite these differences in baseline activity,  
617 the anesthetized experiments recapitulated several key aspects of the awake data. First,  
618 the background stimulus elevated baseline RS and FS firing rates (Fig. 4B, C), in the form  
619 of stimulus-locked spikes (Fig. 4B). Further, adaptation clearly decreased the peak (Fig.  
620 4D) and mean evoked firing rates of responses to 300 deg/s punctate stimuli (Fig. 4E),  
621 and qualitatively shifted PSTHs to higher response latencies (Fig. 4D). One notable  
622 difference between the anesthetized and awake sessions was that excitatory neurons  
623 were not differentially adapted under anesthesia (Fig. 4F). In light of this, it is possible  
624 that the stronger cortical inhibition typical of wakefulness (Haider et al., 2013) contributed  
625 to adaptation of RS cells in our awake recordings via robust feedforward inhibition, such  
626 that RS adaptation was more profound during wakefulness than would be predicted from  
627 FS adaptation.

628  
629 In summary, the elevation of (stimulus-locked) firing with presentation of background  
630 sensory stimulation, and net adaptation of S1 punctate stimulus responses was robust to  
631 anesthesia, suggesting that feedforward mechanisms explain these phenomena. In  
632 contrast, the differential adaptation of S1 excitatory neurons was abolished by anesthesia,  
633 suggesting the set of mechanisms underlying this phenomenon – possibly including  
634 strong feedforward inhibition – were not all active in the anesthetized state.

635  
636 **Adaptation reduces tonic and burst rates, and synchronous spiking, in VPM**  
637 **sensory responses**

638

639 Having established that several aspects of S1 sensory adaptation may be due to  
640 feedforward mechanisms, we next sought to identify those mechanisms. Based on  
641 previous work in slice and under anesthesia, we reasoned that our results largely  
642 represented some combination of adaptation of VPM sensory responses and activity-  
643 dependent depression of thalamocortical and intracortical synapses. Specifically,  
644 repetitive stimulation has been shown to reduce VPM sensory response spike rates  
645 (Ganmor et al., 2010; Hartings et al., 2003; Khatri et al., 2004; Liu et al., 2017;  
646 Ollerenshaw et al., 2014; Wang et al., 2010; Whitmire et al., 2016a), single-unit bursting  
647 (Whitmire et al., 2016b) and population synchrony (Ollerenshaw et al., 2014; Wang et al.,  
648 2010) in the anesthetized rodent, while also likely depressing the thalamocortical synapse  
649 (Castro-Alamancos & Oldford, 2002; Chung et al., 2002; Gabernet et al., 2005). Can  
650 these mechanisms explain S1 adaptation during wakefulness, and if so, what is the  
651 relative contribution of each?

652

653 As a first step toward addressing these questions, we repeated our experiments while  
654 recording extracellular spiking activity in VPM of the awake mouse (Fig. 5A, see  
655 Methods). As in S1, we found that the background stimulus significantly elevated firing  
656 rates in VPM (Fig. 5B, C) in the form of stimulus-locked spikes (Fig. 5B). We then  
657 characterized VPM responses to punctate stimuli, and the effects of the background  
658 stimulus on these responses. We first parsed VPM spikes into tonic and putative T-type  
659 calcium channel burst spikes ((Whitmire et al., 2016b), Fig. 5D). Bursts are groups of two  
660 or more spikes with very short inter-spike intervals, which have been shown to provide  
661 potent synaptic drive to S1 (Sherman, 2001; Swadlow, 2002; Swadlow & Gusev, 2001),  
662 and may therefore be critical for shaping cortical sensory responses. However, there is  
663 some disagreement as to whether VPM bursting occurs during wakefulness, when VPM  
664 is likely to be on average relatively depolarized. We did, in fact, observe sensory-evoked  
665 bursting, though burst spikes constituted a minority of total evoked spikes (Fig. 5E).  
666 Further, the punctate stimulus evoked both a short-latency primary peak, and a shorter,  
667 secondary peak in tonic firing rates (Fig. 5E). This secondary peak in the grand PSTH  
668 resulted from a subset of neurons with both early and late responses – often within  
669 individual trials – and was likely evoked by the return of the whisker to resting position in  
670 the second half of the sawtooth waveform. Next, we found that background stimulation  
671 reduced sawtooth-evoked rates for both tonic and burst spikes (Fig. 5E, F). While the  
672 reduction in overall evoked rate was qualitatively modest in comparison to that of  
673 downstream S1 RS cells (Fig. 1E, F), it has been shown that firing in S1 neurons depends  
674 not only on VPM rate, but on the relative timing of VPM spikes, as near-coincident spikes  
675 in pairs of VPM neurons may be required to effectively drive cortical targets (Bruno &  
676 Sakmann, 2006). We therefore next asked how the rate of synchronous VPM spikes  
677 changed with adaptation. To do this, we generated grand CCGs and calculated



678 synchronous spike counts for each stimulus condition, as done previously for S1 RS cells  
679 (Fig. 3). As in S1, we found that VPm synchronous spike counts were qualitatively a  
680 better indicator than mean evoked rates of stimulus velocity (compare Figs. 5F and 5H),  
681 consistent with previous work in anesthetized rat (Wang et al., 2010). Further, adaptation  
682 significantly and substantially decreased synchronous VPm spike counts for both  
683 deflection velocities (Fig. 5G, H)

684

685 In summary, adaptation in VPm (Fig. 5) was consistent with that observed in downstream  
686 S1 (Figs. 1 – 3) during wakefulness. This suggests S1 response adaptation is inherited  
687 to some degree directly from VPm, and in particular represents an adaptive decrease in  
688 synchronous VPm spiking. Further, our recordings in S1 suggest that cortical RS cells  
689 are particularly sensitive to changes in synchronous VPm spiking when baseline and  
690 evoked inhibitory rates are elevated (as is the case during wakefulness).

691

### 692 **Optogenetic elevation of baseline VPm firing rate does not adapt S1 sensory** 693 **responses**

694

695 While VPm response adaptation predicted weaker excitatory drive to S1, it is also  
696 possible that the background stimulus depressed thalamocortical and/or intracortical  
697 synapses by elevating baseline firing rates, and therefore adapted S1 responses to a  
698 greater degree than that predicted by evoked VPm rate alone. What were the relative  
699 contributions of thalamic adaptation and synaptic depression? We sought to disentangle  
700 these two candidate mechanisms by elevating baseline VPm rates without adapting VPm  
701 sensory responses. To accomplish this, we utilized a transgenic mouse (Ai32 x Nsmf-  
702 Cre) expressing Channelrhodopsin in VPm/VPI cell bodies, axons, and thalamocortical  
703 axon terminals. We inserted either a tungsten or a 32-channel silicon optoelectrode into  
704 VPm of the awake mouse for recording and optogenetic manipulation of thalamic spiking,  
705 and a linear silicon probe into the topographically-aligned column of S1 (Fig. 6A, see  
706 Methods).

707

708 As shown above separately for S1 (Fig. 1) and VPm (Fig. 5B, C), background sensory  
709 stimulation evoked stimulus-locked firing in simultaneously-recorded VPm and S1 units  
710 (Fig. 6B, left). On “LED” trials, we artificially elevated baseline VPm rates by substituting  
711 the sensory white noise with step input of blue light to thalamus (Fig. 6B, right). We  
712 titrated the light power such that mean baseline thalamic rates were comparable to “white  
713 noise” trials (Fig. 6B, 6C, bottom). Interestingly, this did not significantly increase  
714 downstream S1 firing rates above spontaneous levels, despite elevation of VPm rate (Fig.  
715 6B, C, top), consistent with the notion that synchronous thalamic spikes (in this case,  
716 evoked by sensory white noise) are required to effectively drive cortical targets (Bruno &  
717 Sakmann, 2006).



718

719 We next inspected the effects of our manipulations on VPM and S1 responses to 300  
720 deg/s punctate whisker deflections. We were interested in the presence or absence of  
721 gross adaptive effects, and so we grouped together tonic and burst spikes in VPM, and  
722 RS and FS cells in S1 for this analysis. On LED trials, we maintained a constant light  
723 level during presentation of the sensory stimulus, to avoid transient VPM responses to  
724 reduction in light power. As shown above separately for S1 (Fig. 1) and VPM (Fig. 5),  
725 background sensory stimulation adapted simultaneously recorded responses in S1 (Fig.  
726 6D, bottom). We next inspected the effects of optogenetically-elevated baseline VPM  
727 rates on sensory responses. If the “artificial” elevation of baseline VPM rate adapted TC  
728 synapses prior to delivery of the punctate sensory stimulus, we would anticipate adapted  
729 S1 sensory responses on LED trials, despite the non-adapted VPM sensory response  
730 (Fig. 6D, bottom). On the contrary, we observed no significant differences in S1 sensory  
731 response rates between the control and LED conditions (Fig. 6D, top), suggesting  
732 optogenetic elevation of baseline VPM rates did not appreciably adapt TC synapses.  
733 Importantly, LED presentation did not significantly enhance synchronous spike counts in  
734 the VPM sensory response relative to control trials (Fig. 6E), thus ruling out the possible  
735 confound of enhanced sensory-evoked thalamic synchrony masking the effects of  
736 synaptic depression.

737

738 To conclude, these manipulation experiments suggest that although background sensory  
739 stimulation elevates baseline VPM rates, this does not appreciably depress TC synapses,  
740 and other mechanisms underlie the adaptation of S1 responses to punctate whisker  
741 deflections.

742

### 743 **S1 responses to direct terminal stimulation are only weakly adapted by sensory** 744 **white noise**

745

746 In the above experiments, baseline S1 rates were not significantly elevated on LED trials  
747 (Fig. 6C, top). In contrast, the background sensory stimulus significantly elevated  
748 baseline S1 firing (Fig. 6C, top), before presentation of the punctate stimulus. This leaves  
749 open the possibility that the adaptive effects of the background stimulus were largely due  
750 to intracortical synaptic depression, which was induced by the sensory white noise, but  
751 not the LED. Further, evoked VPM rates were slightly higher on LED trials than on control  
752 trials (Fig. 6D, bottom). It is possible then, that synapses were depressed on LED trials,  
753 but that the elevation in evoked VPM rate counteracted these adaptive effects. To  
754 address these potential confounds, we sought to more directly compare synaptic  
755 strengths in the absence and presence of background sensory stimulation. To do this,  
756 we took advantage of the expression of Channelrhodopsin in thalamocortical axon  
757 terminals of our transgenic mouse. We positioned an LED-coupled optic fiber above the

758 cortical surface and recorded extracellular spiking activity with a silicon probe array in S1  
759 of the lightly-anesthetized mouse (Fig. 7A). On “punctate sensory” trials, we presented  
760 300 deg/s sawtooth whisker deflections, as described previously. On “punctate terminal”  
761 trials, we substituted the punctate sensory stimulus with brief optogenetic stimulation of  
762 TC terminals in the principal column. In both cases, we presented the punctate stimuli  
763 either in isolation (control trials) or embedded in a background sensory stimulus (adapted  
764 trials). We then considered the punctate sensory and punctate terminal responses of all  
765 single- and multi-units that responded significantly to the isolated punctate sensory  
766 stimulus (see Methods).

767  
768 As shown above for awake (Fig. 1) and anesthetized (Fig. 4) mice, S1 sensory response  
769 grand PSTHs exhibited profound sensory adaptation (Fig. 7B, left). If this largely reflected  
770 synaptic depression, we would expect that punctate terminal stimulus responses would  
771 be similarly adapted by the background sensory stimulus. Instead, there was  
772 comparatively little evidence of adaptation in the grand PSTHs for punctate terminal trials  
773 (Fig. 7B, right). Importantly, this did not simply reflect an overwhelmingly strong LED  
774 stimulus; not only were evoked rates generally lower for LED responses than for punctate  
775 sensory responses across all neurons (Fig. 7B, C), but in exploring a variety of LED  
776 stimulus amplitudes and durations across experiments, we found that both relatively  
777 large- and small-amplitude LED-evoked PSTHs were at most only modestly adapted (not  
778 shown). This result also bore out in mean evoked rates: mean response rates for  
779 punctate sensory trials were profoundly adapted (Fig. 7C, left), while responses on  
780 punctate terminal trials were only slightly adapted (Fig. 7C, right), and the population  
781 median normalized adapted response was near 1 for punctate terminal trials, but  
782 significantly more negative for punctate sensory trials (Fig. 7D).

783  
784 To investigate this more deeply, we repeated these anesthetized experiments while  
785 obtaining in vivo patch clamp recordings from neurons in S1 to inspect the subthreshold  
786 dynamics underlying these observations (Fig. 7E, left, see Methods). We recorded from  
787 four neurons that responded to both punctate sensory and terminal stimulation. While  
788 sensory- and light-evoked amplitudes varied across neurons (Fig. 7F, top), the adapting  
789 effects of the background stimulus on subthreshold sensory responses were generally  
790 not observed in terminal stimulation responses. Specifically, for punctate sensory  
791 responses, the across-trial mean amplitude significantly decreased for three cells, and  
792 the time to response peak significantly increased for all cells, (Fig. 7F, left, see Methods),  
793 consistent with the extracellular recordings (Fig. 7B, C). In contrast, almost none of these  
794 measures changed significantly for any of the cells’ responses to terminal stimulation (Fig.  
795 7F, right).

796

797 While there are important caveats to consider when interpreting responses to optogenetic  
798 terminal stimulation (see Discussion), when taken together with the profound effects of  
799 adaptation on synchronous VPM spiking (Fig. 5G, H), and the lack of S1 adaptation under  
800 optogenetic elevation of baseline VPM rates (Fig. 6), these results suggest that rapid  
801 sensory adaptation of sensory-evoked firing rates in the awake mouse (Fig. 1) primarily  
802 reflects adaptation of thalamic sensory responses, with thalamocortical and intracortical  
803 synaptic adaptation playing a lesser role.

804

### 805 **A model network identifies synchronous VPM spikes and robust feedforward** 806 **inhibition as key mechanisms underlying S1 response adaptation**

807

808 We observed profound adaptation of S1 sensory responses wakefulness (Fig. 1).  
809 Further, the degree of adaptation among RS (putative excitatory) cells was greater than  
810 would be predicted from that of FS cells (Fig. 1F – H) and upstream VPM cells (Fig. 5F).  
811 These observations, combined with the results of our anesthetized (Fig. 4) and  
812 optogenetic manipulation (Figs. 6, 7) experiments, suggest a particular mechanistic  
813 interpretation: cortical excitatory neurons are extremely sensitive to adaptive changes in  
814 synchronous VPM spiking, in part due to robust feedforward inhibition. As a final test of  
815 this assertion, we implemented a model thalamocortical network, and assessed its ability  
816 to reproduce profound, cell-type-specific adaptation.

817 We modeled a single S1 barrel as a clustered network of 800 excitatory and 100 inhibitory  
818 leaky integrate-and-fire neurons, subject to excitatory inputs from a model “VPM  
819 barreloid” (Fig. 8A). The barreloid was modeled as 40 independent trains of tonic and  
820 burst spikes, with spike times drawn from the empirical VPM probability distribution  
821 functions (PDFs, or normalized PSTHs). We selected cortical network and intrinsic  
822 neuronal parameters that mimicked measurements from previous studies, and then  
823 adjusted parameters slightly to ensure stable ongoing and evoked network activity (see  
824 Methods). We implemented differential thalamocortical (TC) connectivity, which  
825 consisted of three key components motivated by previous experimental work. First,  
826 inhibitory neurons had higher “TC convergence” (or proportion of VPM neurons that  
827 synapse onto each cortical neuron) than excitatories (0.75 vs. 0.5, (Bruno & Simons,  
828 2002)). Second, the baseline and evoked firing rate of each VPM train was multiplied by  
829 a factor drawn from a skewed distribution (with mean of 1.0), and neurons with the highest  
830 rates synapsed exclusively onto inhibitory neurons ((Bruno & Simons, 2002), see  
831 Methods). Finally, TC synaptic latencies were on average 1 ms shorter for inhibitory  
832 neurons (Cruikshank et al., 2007; Kimura et al., 2010). With this architecture in place, we  
833 modeled 50 trials from each stimulus condition of interest.

834 We fine-tuned the model parameters to give qualitatively realistic peak rates for excitatory  
835 neurons when VPM spike times were drawn from the control (unadapted) empirical

836 PSTHs for the 300 deg/s and 900 deg/s stimuli (Fig. 8B). Thus, the excitatory population  
837 was appropriately tuned to the rate and synchrony of thalamic firing. Next, we repeated  
838 the simulations using VPm spikes drawn from the adapted PSTHs (Fig. 8B, top, filled  
839 PSTH), and found that network excitatory neurons were in fact profoundly adapted,  
840 despite the only modest reduction in mean VPm rates (Fig. 8B, center). Further,  
841 excitatory neurons were generally more strongly adapted than inhibitory neurons in terms  
842 of mean evoked rate (Fig. 8B, C). Finally, as observed in experiment (Fig. 3D – G),  
843 synchronous spike counts were significantly reduced in the adapted condition for  
844 excitatory-excitatory (Fig. 8D, left) and inhibitory-inhibitory (Fig. 8D, right) pairs (see  
845 Methods), with a more drastic reduction for excitatory neurons. Thus, the mechanisms  
846 incorporated in this simple model were sufficient to qualitatively reproduce our key  
847 experimental results.

848 In these simulations, both the mean VPm rate (Fig. 8B, top) and VPm synchronous  
849 spiking (Fig. 8E, top) were reduced in the adapted condition. We next assessed the  
850 degree to which the loss in synchronous VPm spikes alone could explain cortical  
851 adaptation. To do this, we repeated the simulations while “manually” manipulating VPm  
852 spike times. Specifically, we first drew VPm spike times from the control PDFs, and for  
853 each spike that occurred within 5 ms of the PSTH peak time, we shifted the spike to a  
854 random higher latency (within approximately 20 ms of the peak) with 30% probability (see  
855 Methods). This had the effect of maintaining the mean evoked VPm rate, while reducing  
856 the number of near-coincident pairs of VPm spikes in the early response (Fig. 8E, bottom,  
857 “reduced synch” condition). We found that this change alone – which only modestly  
858 affected the resulting VPm grand PSTH (Fig. 8F, top) – was sufficient to profoundly adapt  
859 mean excitatory evoked rates (Fig. 8F, center; 8G, top) and synchronous spike counts  
860 (Fig. 8H). In other words, with differential TC connectivity in place, a loss of synchronous  
861 VPm spiking was sufficient to reproduce the adapted cortical network response.

862 Finally, we asked whether robust feedforward inhibition – mediated by differential  
863 thalamocortical connectivity – contributed to the adaptation of network excitatory neurons.  
864 We modified the network slightly by setting identical TC convergence and TC synaptic  
865 latency values for excitatory and inhibitory neurons and eliminating rate-dependent TC  
866 connectivity (Fig. 8I). Inhibitory and excitatory neurons therefore had identical mean  
867 thalamocortical connection properties, though differences in intrinsic neuronal properties  
868 and dense excitatory-to-inhibitory connectivity still allowed for higher mean firing rates in  
869 the inhibitory population (see Methods). We then slightly reduced the mean TC synaptic  
870 weight to yield reasonable excitatory responses in the control condition (see Methods),  
871 before inspecting the responses to adapted VPm inputs. For this network, the mean  
872 evoked rates (Fig. 8J, top, K) and synchronous spike counts (Fig. 8L, left) for excitatory  
873 neurons were only modestly adapted compared to the model with differential TC  
874 connectivity, and the degree of adaptation more closely matched that of the inhibitory

875 population (Fig. 8K, L, right). In other words, the excitatory population was less sensitive  
876 to VPM adaptation when differential TC connectivity was removed. We used an additional  
877 set of models to further assess the relative importance of each component of the  
878 differential TC connectivity in the original model. While each component contributed, we  
879 found that the degree of excitatory adaptation was most sensitive to differences in TC  
880 synaptic latencies (not shown). This model thus demonstrates the role of robust  
881 feedforward inhibition – reflecting differential TC connectivity – in shaping the adaptation  
882 of cortical excitatory neurons.

883 Taken together, these simulations support our hypotheses that the profound adaptation  
884 of cortical RS cells during wakefulness represents a loss of synchronous sensory-evoked  
885 thalamic spikes, in conjunction with strong feedforward inhibition that is comparatively  
886 robust to this decrease in feedforward thalamic drive.

887



## 888 **DISCUSSION**

889 To determine the nature of rapid sensory adaptation and how it shapes sensory  
890 representations in primary sensory cortex during wakefulness, we recorded single-unit  
891 activity in S1 of the awake, head-fixed mouse while presenting punctate sensory stimuli  
892 either in isolation, or embedded in a persistent background stimulus. To elucidate the  
893 mechanistic basis of cortical adaptation, we identified putative excitatory and inhibitory  
894 cortical neurons and recorded from the lemniscal inputs to S1, while employing a battery  
895 of additional manipulations across the thalamocortical circuit. This approach allowed us  
896 to infer the contributions from thalamic adaptation, thalamocortical synaptic depression,  
897 and intracortical mechanisms. We further implemented a thalamocortical network model  
898 constrained by these observations to explore the relative roles of various candidate  
899 mechanisms at the level of cortex and thalamus.

900 Previous *in vitro* and anesthetized work has clearly demonstrated profound rapid sensory  
901 adaptation in sensory cortex (Cohen-Kashi Malina et al., 2013; Ganmor et al., 2010; Heiss  
902 et al., 2008; Kheradpezhohu et al., 2017; Ollerenshaw et al., 2014; Wang et al., 2010;  
903 Zheng et al., 2015), which is thought to represent the net effects on the circuit of elevated  
904 firing rates. Yet because baseline cortical firing rates are elevated during wakefulness  
905 compared to the anesthetized state (Aasebø et al., 2017; Greenberg et al., 2008; Vizuite  
906 et al., 2012), it remains an open question whether any room is left for fine-tuning by the  
907 sensory environment (Castro-Alamancos, 2004). Here, we demonstrate that cortical  
908 sensory responses can indeed be profoundly adapted during wakefulness. While we did  
909 not directly test the perceptual implications, the adaptive decrease in theoretical stimulus  
910 detectability and synchronous firing of putative cortical excitatory neurons suggest that  
911 downstream targets of S1 will be substantially less driven in the adapted state, which in  
912 general predicts a decrease in perceived stimulus intensity and a loss in behavioral  
913 detectability. In the specific context of the rodent whisker system, our observations are  
914 consistent with previous behavioral work in rats, which demonstrated changes in  
915 perceptual reporting following repetitive whisker stimulation (Ollerenshaw et al., 2014;  
916 Waiblinger et al., 2015) and whisker self-motion (Ollerenshaw et al., 2012), which  
917 elevates thalamic (Urbain et al., 2015) and cortical (Yu et al., 2016, 2019) firing rates. In  
918 other words, this study supports previous *in vitro* and anesthetized work suggesting  
919 cortical response adaptation could underlie adaptive changes in behavior.

920 We next sought to identify the mechanistic basis for S1 response adaptation. One body  
921 of literature implicates synaptic depression (Castro-Alamancos & Oldford, 2002; Chung  
922 et al., 2002; Cruikshank et al., 2010; Gabernet et al., 2005), while our previous work points  
923 to adaptation of thalamic spike timing (Ollerenshaw et al., 2014; Wang et al., 2010;  
924 Whitmire et al., 2016b), but both viewpoints have originated largely from *in vitro* or  
925 anesthetized preparations. Our results here in the awake mouse support the latter view.  
926 First, adaptation profoundly reduced single-unit bursting and the rate of evoked



927 synchronous spikes in VPM, which predicts attenuated cortical firing (Bruno & Sakmann,  
928 2006; Ollerenshaw et al., 2014; Swadlow & Gusev, 2001; Wang et al., 2010). Further,  
929 optogenetic elevation of baseline VPM rates did not adapt S1 responses to sensory  
930 stimuli, and background sensory stimulation had little effect on S1 responses to direct TC  
931 terminal stimulation. Finally, our modeling demonstrated that modest reductions in  
932 synchronous VPM spiking predicted profound adaptation of downstream excitatory  
933 neurons. Taken together, these results therefore demonstrate for the first time in the  
934 awake animal the sensitivity of cortex to thalamic spike timing in the context of sensory  
935 adaptation, and suggest that synaptic depression contributes little to the observed S1  
936 response attenuation.

937 This apparent lack of TC synaptic depression appears to contradict the results of previous  
938 anesthetized and in vitro studies (Castro-Alamancos & Oldford, 2002; Chung et al., 2002;  
939 Cruikshank et al., 2010; Gabernet et al., 2005). We believe, however, that this reflects a  
940 difference in the strength of adapting stimuli. Specifically, these previous studies used  
941 adapting trains of high-velocity, punctate sensory stimuli and/or electrical stimulation,  
942 whereas we employed a relatively low-amplitude white noise adapting stimulus, which in  
943 terms of total power (Zheng et al., 2015) is many times weaker than the adapting stimuli  
944 used in some previous studies (not shown). This almost certainly adapts the TC circuit  
945 to a lesser degree than punctate stimulus trains, which may explain the apparent  
946 contradiction with previous work. This likely also explains why we did not observe  
947 stronger adaptation of FS units, which has been shown to reflect stronger adaptation of  
948 TC synapses onto inhibitory neurons (Gabernet et al., 2005).

949 When interpreting the results of our optogenetic TC terminal stimulation experiments, it is  
950 important to consider possible confounds. For example, light-evoked TC synaptic activity  
951 may be unnaturally synchronous across synapses, which could potentially negate the  
952 effects of synaptic depression. While we cannot rule out this possibility, we note that the  
953 optogenetic stimulus evoked a broad range of firing rates across recording sessions (Fig.  
954 7C), due in part to our use of a variety of pulse amplitudes and durations, as well as  
955 variability in responsiveness across animals. Yet even weak light-evoked S1 activity was  
956 not appreciably adapted by sensory white noise, suggesting the results cannot be  
957 explained by over-synchronization of TC synapses. The light may also have stimulated  
958 TC terminals emanating from VPM neurons (in the principal and/or adjacent barreloids)  
959 that were at most weakly responsive to sensory stimulation, meaning these synapses  
960 would remain dormant (and unadapted) during background sensory stimulation. Still, this  
961 is extremely unlikely to explain the nearly identical “control” and “adapted” LED responses  
962 we observed; this would require that the LED primarily stimulated TC synapses from non-  
963 responsive VPM neurons, with almost no contribution from the synapses of sensory-  
964 responsive neurons in either the control or adapted conditions. This is unlikely, as we  
965 only considered S1 units that were significantly responsive to the punctate sensory

966 stimulus (and were therefore substantially innervated by sensory-responsive VPM  
967 neurons).

968 While thalamic response adaptation appeared necessary for S1 adaptation, it did not  
969 explain the differential adaptation of mean evoked rate, response latency, and evoked  
970 synchronous spike counts among RS and FS cells during wakefulness. In other words,  
971 RS and FS cells did not provide the same read-out of thalamic spiking. In contrast, RS  
972 rates were no more adapted than FS rates under isoflurane anesthesia, which has been  
973 shown to disproportionately weaken cortical inhibition (Haider et al., 2013; Taub et al.,  
974 2013). This suggested to us that feedforward inhibition contributed to the adaptation of  
975 RS cells during wakefulness. We explored this possibility with a network model, in which  
976 we implemented cell-type-specific TC connectivity motivated by previous experimental  
977 work (Bruno & Simons, 2002): cortical inhibitory neurons were more densely innervated  
978 by TC synapses, and VPM neurons with the highest rates synapsed exclusively onto  
979 inhibitory neurons, yielding a more excitable inhibitory population. We found that S1  
980 response adaptation did largely reflect a loss of synchronous VPM spikes, but that the  
981 profound and differential adaptation of excitatory neurons also required cell-type-specific  
982 TC connectivity. Taken together, these experimental and modeling results suggest a  
983 thalamocortical circuit basis for the observed S1 adaptation, involving a profound loss of  
984 synchronous feedforward excitation, and only a modest decrease in dampening  
985 feedforward inhibition.

986 This adaptive shift in the feedforward E/I balance toward inhibition has implications for  
987 cortical function and perception beyond attenuation of response amplitudes and  
988 perceived stimulus intensities. For example, previous experimental work has  
989 demonstrated that the relative strength and/or timing of cortical excitation and inhibition  
990 contributes to the direction-selectivity (Wilent & Contreras, 2005) and receptive field  
991 properties (Bruno & Simons, 2002; Kyriazi & Simons, 1993; Ramirez et al., 2014) of  
992 excitatory neurons, maintains relatively low excitatory firing rates during bouts of whisking  
993 (Gutnisky et al., 2017; Yu et al., 2016), shapes the “window of integration” during which  
994 excitatory neurons integrate excitatory synaptic inputs and depolarize toward threshold  
995 (Gabernet et al., 2005; Wilent & Contreras, 2005), and generally serves to “dampen”  
996 thalamic-evoked spiking in the excitatory subnetwork (D. J. Pinto et al., 2003).  
997 Thalamocortical adaptation exists on a continuum (Wang et al., 2010; Zheng et al., 2015),  
998 and more moderate levels of adaptation than we imposed here may result in moderately  
999 attenuated excitatory firing that is sharpened in space and time by comparatively non-  
1000 adapted inhibition, resulting in more faithful spatiotemporal cortical representations of  
1001 complex sensory stimuli. Future experiments exploring a broader range of adapting  
1002 stimulus strengths and using more complex single- and multi-whisker stimulation can  
1003 explore these possibilities.

1004 In summary, these results show the profound nature of rapid sensory adaptation at the  
1005 level of primary sensory cortex that likely reflects the emergence of neural correlates that  
1006 underlie perceptual adaptation on this timescale. Further, they highlight the relative  
1007 importance of thalamic gating in establishing cortical adaptation, through population  
1008 timing control of thalamic drive and the differential engagement of the inhibitory cortical  
1009 sub-population.

1010

1011

1012 **References**

- 1013 Aasebø, I. E. J., Lepperød, M. E., Stavrinou, M., Nøkkevangen, S., Einevoll, G., Hafting,  
1014 T., & Fyhn, M. (2017). Temporal Processing in the Visual Cortex of the Awake and  
1015 Anesthetized Rat. *ENEURO*, 4(4), ENEURO.0059-17.2017.  
1016 <https://doi.org/10.1523/ENEURO.0059-17.2017>
- 1017 Anstis, S., Verstraten, F. A. J., & Mather, G. (1998). The motion aftereffect. *Trends in*  
1018 *Cognitive Sciences*, 2(3), 111–117. [https://doi.org/10.1016/S1364-6613\(98\)01142-5](https://doi.org/10.1016/S1364-6613(98)01142-5)
- 1019 Barlow, H. B. (1961). Possible Principles Underlying the Transformations of Sensory  
1020 Messages. In W. A. Rosenblith (Ed.), *Sensory Communication* (pp. 217–234). The  
1021 MIT Press. <https://doi.org/10.7551/mitpress/9780262518420.003.0013>
- 1022 Barthó, P., Slézia, A., Mátyás, F., Faradzs-Zade, L., Ulbert, I., Harris, K. D., & Acsády,  
1023 L. (2014). Ongoing network state controls the length of sleep spindles via inhibitory  
1024 activity. *Neuron*, 82(6), 1367–1379. <https://doi.org/10.1016/j.neuron.2014.04.046>
- 1025 Bestelmeyer, P. E. G., Rouger, J., DeBruine, L. M., & Belin, P. (2010). Auditory  
1026 adaptation in vocal affect perception. *Cognition*, 117(2), 217–223.  
1027 <https://doi.org/10.1016/j.cognition.2010.08.008>
- 1028 Blakemore, C., & Campbell, F. W. (1969). On the existence of neurones in the human  
1029 visual system selectively sensitive to the orientation and size of retinal images. *The*  
1030 *Journal of Physiology*, 203(1), 237–260.  
1031 <https://doi.org/10.1113/jphysiol.1969.sp008862>
- 1032 Blakemore, Colin, & Nachmias, J. (1971). The orientation specificity of two visual after-  
1033 effects. *The Journal of Physiology*, 213(1), 157–174.  
1034 <https://doi.org/10.1113/jphysiol.1971.sp009374>
- 1035 Brecht, M., & Sakmann, B. (2002). Whisker maps of neuronal subclasses of the rat  
1036 ventral posterior medial thalamus, identified by whole-cell voltage recording and  
1037 morphological reconstruction. *The Journal of Physiology*, 495–515.  
1038 <https://doi.org/10.1013/jphysiol.2001.012334>
- 1039 Bruno, R. M., & Sakmann, B. (2006). Cortex is driven by weak but synchronously active  
1040 thalamocortical synapses. *Science (New York, N.Y.)*, 312(5780), 1622–1627.  
1041 <https://doi.org/10.1126/science.1124593>
- 1042 Bruno, R. M., & Simons, D. J. (2002). Feedforward mechanisms of excitatory and  
1043 inhibitory cortical receptive fields. *J Neurosci*, 22(24), 10966–10975.  
1044 <https://doi.org/22/24/10966> [pii]
- 1045 Bujan, A. F., Aertsen, A., Kumar, X. A., Kumar, A., & Kumar, X. A. (2015). Role of Input  
1046 Correlations in Shaping the Variability and Noise Correlations of Evoked Activity in  
1047 the Neocortex. *Journal of Neuroscience*, 35(22), 8611–8625.  
1048 <https://doi.org/10.1523/JNEUROSCI.4536-14.2015>
- 1049 Castro-Alamancos, M. A. (2004). Absence of Rapid Sensory Adaptation in Neocortex  
1050 during Information Processing States. *Neuron*, 41(3), 455–464.

- 1051 [https://doi.org/10.1016/S0896-6273\(03\)00853-5](https://doi.org/10.1016/S0896-6273(03)00853-5)
- 1052 Castro-Alamancos, M. A., & Oldford, E. (2002). Cortical sensory suppression during  
1053 arousal is due to the activity-dependent depression of thalamocortical synapses.  
1054 *The Journal of Physiology*, 541(1), 319–331.  
1055 <https://doi.org/10.1113/jphysiol.2002.016857>
- 1056 Chung, S., Li, X., & Nelson, S. B. (2002). Short-term depression at thalamocortical  
1057 synapses contributes to rapid adaptation of cortical sensory responses in vivo.  
1058 *Neuron*, 34(3), 437–446. [https://doi.org/10.1016/S0896-6273\(02\)00659-1](https://doi.org/10.1016/S0896-6273(02)00659-1)
- 1059 Cohen-Kashi Malina, K., Jubran, M., Katz, Y., & Lampl, I. (2013). Imbalance between  
1060 excitation and inhibition in the somatosensory cortex produces postadaptation  
1061 facilitation. *The Journal of Neuroscience : The Official Journal of the Society for*  
1062 *Neuroscience*, 33(19), 8463–8471. [https://doi.org/10.1523/JNEUROSCI.4845-](https://doi.org/10.1523/JNEUROSCI.4845-12.2013)  
1063 [12.2013](https://doi.org/10.1523/JNEUROSCI.4845-12.2013)
- 1064 Cruikshank, S. J., Lewis, T. J., & Connors, B. W. (2007). Synaptic basis for intense  
1065 thalamocortical activation of feedforward inhibitory cells in neocortex. *Nature*  
1066 *Neuroscience*, 10(4), 462–468. <https://doi.org/10.1038/nn1861>
- 1067 Cruikshank, S. J., Urabe, H., Nurmikko, A. V., & Connors, B. W. (2010). Pathway-  
1068 Specific Feedforward Circuits between Thalamus and Neocortex Revealed by  
1069 Selective Optical Stimulation of Axons. *Neuron*, 65(2), 230–245.  
1070 <https://doi.org/10.1016/j.neuron.2009.12.025>
- 1071 Erb, J., Henry, M. J., Eisner, F., & Obleser, J. (2013). The brain dynamics of rapid  
1072 perceptual adaptation to adverse listening conditions. *Journal of Neuroscience*,  
1073 33(26), 10688–10697. <https://doi.org/10.1523/JNEUROSCI.4596-12.2013>
- 1074 Gabernet, L., Jadhav, S. P., Feldman, D. E., Carandini, M., & Scanziani, M. (2005).  
1075 Somatosensory integration controlled by dynamic thalamocortical feed-forward  
1076 inhibition. *Neuron*, 48(2), 315–327. <https://doi.org/10.1016/j.neuron.2005.09.022>
- 1077 Ganmor, E., Katz, Y., & Lampl, I. (2010). Intensity-dependent adaptation of cortical and  
1078 thalamic neurons is controlled by brainstem circuits of the sensory pathway.  
1079 *Neuron*, 66(2), 273–286. <https://doi.org/10.1016/j.neuron.2010.03.032>
- 1080 Gentet, L. J., Avermann, M., Matyas, F., Staiger, J. F., & Petersen, C. C. H. H. (2010).  
1081 Membrane potential dynamics of GABAergic neurons in the barrel cortex of  
1082 behaving mice. *Neuron*, 65(3), 422–435.  
1083 <https://doi.org/10.1016/j.neuron.2010.01.006>
- 1084 Ghodrati, M., Zavitz, E., Rosa, M. G. P., & Price, N. S. C. (2019). Contrast and  
1085 luminance adaptation alter neuronal coding and perception of stimulus orientation.  
1086 *Nature Communications*, 10(1). <https://doi.org/10.1038/s41467-019-08894-8>
- 1087 Greenberg, D. S., Houweling, A. R., & Kerr, J. N. D. (2008). Population imaging of  
1088 ongoing neuronal activity in the visual cortex of awake rats. *Nature Neuroscience*,  
1089 11(7), 749–751. <https://doi.org/10.1038/nn.2140>
- 1090 Gutnisky, D. A., Yu, J., Hires, S. A., To, M. S., Bale, M. R., Svoboda, K., & Golomb, D.



- 1091 (2017). Mechanisms underlying a thalamocortical transformation during active  
1092 tactile sensation. In *PLoS Computational Biology* (Vol. 13, Issue 6).  
1093 <https://doi.org/10.1371/journal.pcbi.1005576>
- 1094 Haider, B., Häusser, M., & Carandini, M. (2013). Inhibition dominates sensory  
1095 responses in the awake cortex. *Nature*, *493*(7430), 97–102.  
1096 <https://doi.org/10.1038/nature11665>
- 1097 Hartings, J. A., Temereanca, S., & Simons, D. J. (2003). Processing of Periodic Whisker  
1098 Deflections by Neurons in the Ventroposterior Medial and Thalamic Reticular  
1099 Nuclei. *Journal of Neurophysiology*, *90*(5), 3087–3094.  
1100 <https://doi.org/10.1152/jn.00469.2003>
- 1101 Heiss, J. E., Katz, Y., Ganmor, E., & Lampl, I. (2008). Shift in the Balance between  
1102 Excitation and Inhibition during Sensory Adaptation of S1 Neurons. *The Journal of*  
1103 *Neuroscience : The Official Journal of the Society for Neuroscience*, *28*(49), 13320–  
1104 13330. <https://doi.org/10.1523/JNEUROSCI.2646-08.2008>
- 1105 Jadhav, S. P., & Feldman, D. E. (2010). Texture coding in the whisker system. *Current*  
1106 *Opinion in Neurobiology*, *20*(3), 313–318.  
1107 <https://doi.org/10.1016/j.conb.2010.02.014>
- 1108 Jadhav, S. P., Wolfe, J., & Feldman, D. E. (2009). *Sparse temporal coding of*  
1109 *elementary tactile features during active whisker sensation*. *12*(6).  
1110 <https://doi.org/10.1038/nn.2328>
- 1111 Khatri, V., Hartings, J. A., & Simons, D. J. (2004). Adaptation in thalamic barreloid and  
1112 cortical barrel neurons to periodic whisker deflections varying in frequency and  
1113 velocity. *Journal of Neurophysiology*, *92*(6), 3244–3254.  
1114 <https://doi.org/10.1152/jn.00257.2004>
- 1115 Kheradpezhoh, E., Adibi, M., & Arabzadeh, E. (2017). Response dynamics of rat barrel  
1116 cortex neurons to repeated sensory stimulation. *Scientific Reports*, *7*(1), 1–10.  
1117 <https://doi.org/10.1038/s41598-017-11477-6>
- 1118 Kimura, F., Itami, C., Ikezoe, K., Tamura, H., Fujita, I., Yanagawa, Y., Obata, K., &  
1119 Ohshima, M. (2010). Fast activation of feedforward inhibitory neurons from thalamic  
1120 input and its relevance to the regulation of spike sequences in the barrel cortex.  
1121 *Journal of Physiology*, *588*(15), 2769–2787.  
1122 <https://doi.org/10.1113/jphysiol.2010.188177>
- 1123 Kodandaramaiah, S. B., Holst, G. L., Wickersham, I. R., Singer, A. C., Franzesi, G. T.,  
1124 McKinnon, M. L., Forest, C. R., & Boyden, E. S. (2016). Assembly and operation of  
1125 the autopatcher for automated intracellular neural recording in vivo. *Nature*  
1126 *Protocols*, *1*(4), 634–654. <https://doi.org/10.1038/nprot.2016.007>
- 1127 Kyriazi, H., & Simons, D. (1993). Thalamocortical response transformations in simulated  
1128 whisker barrels. *The Journal of Neuroscience*, *13*(4), 1601–1615.  
1129 <https://doi.org/10.1523/JNEUROSCI.13-04-01601.1993>
- 1130 Litwin-Kumar, A., & Doiron, B. (2012). Slow dynamics and high variability in balanced



- 1131 cortical networks with clustered connections. *Nature Neuroscience*, 15(11), 1498–  
1132 1505. <https://doi.org/10.1038/nn.3220>
- 1133 Liu, C., Foffani, G., Scaglione, A., Aguilar, J., & Moxon, K. A. (2017). Adaptation of  
1134 thalamic neurons provides information about the spatiotemporal context of stimulus  
1135 history. *The Journal of Neuroscience*, 0637–17.  
1136 <https://doi.org/10.1523/JNEUROSCI.0637-17.2017>
- 1137 Manita, S., Suzuki, T., Homma, C., Matsumoto, T., Odagawa, M., Yamada, K., Ota, K.,  
1138 Matsubara, C., Inutsuka, A., Sato, M., Ohkura, M., Yamanaka, A., Yanagawa, Y.,  
1139 Nakai, J., Hayashi, Y., Larkum, M. E., & Murayama, M. (2015). A Top-Down  
1140 Cortical Circuit for Accurate Sensory Perception. *Neuron*, 86(5), 1304–1316.  
1141 <https://doi.org/10.1016/j.neuron.2015.05.006>
- 1142 McGinley, M. J. M. M. J., David, S. S. V. S. S. V. S., & McCormick, D. A. (2015).  
1143 Cortical Membrane Potential Signature of Optimal States for Sensory Signal  
1144 Detection. *Neuron*, 87(1), 179–192. <https://doi.org/10.1016/j.neuron.2015.05.038>
- 1145 McGinley, M. J., Vinck, M., Reimer, J., Batista-Brito, R., Zaghera, E., Cadwell, C. R.,  
1146 Tolias, A. S., Cardin, J. A., & McCormick, D. A. (2015). Waking State: Rapid  
1147 Variations Modulate Neural and Behavioral Responses. *Neuron*, 87(6), 1143–1161.  
1148 <https://doi.org/10.1016/j.neuron.2015.09.012>
- 1149 Musall, S., Behrens, W. Von Der, Mayrhofer, J. M., Weber, B., Helmchen, F., Haiss, F.,  
1150 Von Der Behrens, W., Mayrhofer, J. M., Weber, B., Helmchen, F., Haiss, F.,  
1151 Behrens, W. Von Der, Mayrhofer, J. M., Weber, B., Helmchen, F., & Haiss, F.  
1152 (2014). Tactile frequency discrimination is enhanced by circumventing neocortical  
1153 adaptation. *Nature Neuroscience*, 17(11), 1567–1573.  
1154 <https://doi.org/10.1038/nn.3821>
- 1155 Ollerenshaw, D. R., Bari, B. a, Millard, D. C., Orr, L. E., Wang, Q., & Stanley, G. B.  
1156 (2012). Detection of tactile inputs in the rat vibrissa pathway. *Journal of*  
1157 *Neurophysiology*, 108(2), 479–490. <https://doi.org/10.1152/jn.00004.2012>
- 1158 Ollerenshaw, D. R., Zheng, H. J. V., Millard, D. C., Wang, Q., & Stanley, G. B. (2014).  
1159 The Adaptive Trade-Off between Detection and Discrimination in Cortical  
1160 Representations and Behavior. *Neuron*, 81(5), 1152–1164.  
1161 <https://doi.org/10.1016/j.neuron.2014.01.025>
- 1162 Pinto, D. J. D., Brumberg, J. C. J., & Simons, D. J. D. J. (2000). Circuit dynamics and  
1163 coding strategies in rodent somatosensory cortex. *Journal of Neurophysiology*,  
1164 83(3), 1158–1166. <https://doi.org/10.1152/jn.2000.83.3.1158>
- 1165 Pinto, D. J., Hartings, J. A., Brumberg, J. C., & Simons, D. J. (2003). Cortical damping:  
1166 Analysis of thalamocortical response transformations in rodent barrel cortex.  
1167 *Cerebral Cortex*, 13(1), 33–44. <https://doi.org/10.1093/cercor/13.1.33>
- 1168 Ramirez, A., Pnevmatikakis, E. A., Merel, J., Paninski, L., Miller, K. D., & Bruno, R. M.  
1169 (2014). Spatiotemporal receptive fields of barrel cortex revealed by reverse  
1170 correlation of synaptic input. *Nat Neurosci*, 17(6), 866–875.  
1171 <https://doi.org/10.1038/nn.3720>

- 1172 Reimer, J., Froudarakis, E., Cadwell, C. R., Yatsenko, D., Denfield, G. H., & Tolias, A.  
1173 S. (2014). Pupil Fluctuations Track Fast Switching of Cortical States during Quiet  
1174 Wakefulness. *Neuron*, *84*(2), 355–362.  
1175 <https://doi.org/10.1016/j.neuron.2014.09.033>
- 1176 Reimer, J., Mcginley, M. J., Liu, Y., Rodenkirch, C., Wang, Q., McCormick, D. A., &  
1177 Tolias, A. S. (2016). Pupil fluctuations track rapid changes in adrenergic and  
1178 cholinergic activity in cortex. *Nature Communications*, *7*(May), 1–7.  
1179 <https://doi.org/10.1038/ncomms13289>
- 1180 Ritt, J. T., Andermann, M. L., & Moore, C. I. (2008). Embodied Information Processing:  
1181 Vibrissa Mechanics and Texture Features Shape Micromotions in Actively Sensing  
1182 Rats. *Neuron*, *57*(4), 599–613. <https://doi.org/10.1016/j.neuron.2007.12.024>
- 1183 Safaai, H., von Heimendahl, M., Sorando, J. M., Diamond, M. E., & Maravall, M. (2013).  
1184 Coordinated Population Activity Underlying Texture Discrimination in Rat Barrel  
1185 Cortex. *Journal of Neuroscience*, *33*(13), 5843–5855.  
1186 <https://doi.org/10.1523/JNEUROSCI.3486-12.2013>
- 1187 Sederberg, A., Pala, A., Zheng, H., He, B. J., & Stanley, G. B. (2018). *State-aware*  
1188 *detection of sensory stimuli in the cortex of the awake mouse.*
- 1189 Sermet, B. S., Truschow, P., Feyerabend, M., Mayrhofer, J. M., Oram, T. B., Yizhar, O.,  
1190 Staiger, J. F., & Petersen, C. C. H. (2019). Pathway-, layer- and cell-type-specific  
1191 thalamic input to mouse barrel cortex. *ELife*, *8*, 1–28.  
1192 <https://doi.org/10.7554/eLife.52665>
- 1193 Sherman, S. M. (2001). A wake-up call from the thalamus. *Nature Neuroscience*, *4*(4),  
1194 344–346. <https://doi.org/10.1038/85973>
- 1195 Smith, M. W., & Faulkner, A. (2006). Perceptual adaptation by normally hearing  
1196 listeners to a simulated “hole” in hearing. *The Journal of the Acoustical Society of*  
1197 *America*, *120*(6), 4019–4030. <https://doi.org/10.1121/1.2359235>
- 1198 Stoy, W. M., Yang, B., Kight, A., Wright, N. C., Borden, P. Y., Stanley, G. B., & Forest,  
1199 C. R. (2020). Compensation of physiological motion enables high-yield whole-cell  
1200 recording in vivo. *Biorxiv*.  
1201 <https://doi.org/https://doi.org/10.1101/2020.06.09.143008v1>
- 1202 Suzuki, M., & Larkum, M. E. (2020). General Anesthesia Decouples Cortical Pyramidal  
1203 Neurons. *Cell*, *180*(4), 666–676.e13. <https://doi.org/10.1016/j.cell.2020.01.024>
- 1204 Swadlow, H. A. (2002). Thalamocortical control of feed-forward inhibition in awake  
1205 somatosensory “barrel” cortex. *Philosophical Transactions of the Royal Society B:*  
1206 *Biological Sciences*, *357*(1428), 1717–1727. <https://doi.org/10.1098/rstb.2002.1156>
- 1207 Swadlow, H. A., & Gusev, A. G. (2001). The impact of “bursting” thalamic impulses at a  
1208 neocortical synapse. *Nature Neuroscience*, *4*(4), 402–408.  
1209 <https://doi.org/10.1038/86054>
- 1210 Tannan, V., Simons, S., Dennis, R. G., & Tommerdahl, M. (2007). Effects of adaptation  
1211 on the capacity to differentiate simultaneously delivered dual-site vibrotactile

- 1212 stimuli. *Brain Research*, 1186(1), 164–170.  
1213 <https://doi.org/10.1016/j.brainres.2007.10.024>
- 1214 Taub, A. H., Katz, Y., & Lampl, I. (2013). Cortical Balance of Excitation and Inhibition Is  
1215 Regulated by the Rate of Synaptic Activity. *Journal of Neuroscience*, 33(36),  
1216 14359–14368. <https://doi.org/10.1523/JNEUROSCI.1748-13.2013>
- 1217 Urbain, N., Salin, P. A., Libourel, P. A., Comte, J. C., Gentet, L. J., & Petersen, C. C. H.  
1218 (2015). Whisking-Related Changes in Neuronal Firing and Membrane Potential  
1219 Dynamics in the Somatosensory Thalamus of Awake Mice. *Cell Reports*, 13(4),  
1220 647–656. <https://doi.org/10.1016/j.celrep.2015.09.029>
- 1221 Vizuete, J. A., Pillay, S., Diba, K., Ropella, K. M., & Hudetz, A. G. (2012). Monosynaptic  
1222 functional connectivity in cerebral cortex during wakefulness and under graded  
1223 levels of anesthesia. *Frontiers in Integrative Neuroscience*, 6(SEPTEMBER), 1–11.  
1224 <https://doi.org/10.3389/fnint.2012.00090>
- 1225 Waiblinger, C., Brugger, D., Whitmire, C. J., Stanley, G. B., & Schwarz, C. (2015).  
1226 Support for the slip hypothesis from whisker-related tactile perception of rats in a  
1227 noisy environment. *Frontiers in Integrative Neuroscience*, 9(October), e53.  
1228 <https://doi.org/10.3389/fnint.2015.00053>
- 1229 Wang, Q., Webber, R. M., & Stanley, G. B. (2010). Thalamic synchrony and the  
1230 adaptive gating of information flow to cortex. *Nature Neuroscience*, 13(12), 1534–  
1231 1541. <https://doi.org/10.1038/nn.2670>
- 1232 Whitmire, C. J., Waiblinger, C., Schwarz, C., & Stanley, G. B. (2016a). Information  
1233 Coding through Adaptive Gating of Article Information Coding through Adaptive  
1234 Gating of Synchronized Thalamic Bursting. *Cell Reports*, 1–13.  
1235 <https://doi.org/10.1016/j.celrep.2015.12.068>
- 1236 Whitmire, C. J., Waiblinger, C., Schwarz, C., & Stanley, G. B. (2016b). Information  
1237 Coding through Adaptive Gating of Synchronized Thalamic Bursting. *Cell Reports*,  
1238 14(4), 795–807. <https://doi.org/10.1016/j.celrep.2015.12.068>
- 1239 Wilent, W. B., & Contreras, D. (2005). Dynamics of excitation and inhibition underlying  
1240 stimulus selectivity in rat somatosensory cortex. *Nature Neuroscience*, 8(10),  
1241 1364–1370. <https://doi.org/10.1038/nn1545>
- 1242 Wolfe, J., Hill, D. N., Pahlavan, S., Drew, P. J., Kleinfeld, D., & Feldman, D. E. (2008).  
1243 Texture coding in the rat whisker system: Slip-stick versus differential resonance.  
1244 *PLoS Biology*, 6(8), 1661–1677. <https://doi.org/10.1371/journal.pbio.0060215>
- 1245 Wright, N. C., Hoseini, M. S., & Wessel, R. (2017). Adaptation modulates correlated  
1246 subthreshold response variability in visual cortex. *Journal of Neurophysiology*,  
1247 118(2), 1257–1269. <https://doi.org/10.1152/jn.00124.2017>
- 1248 Wright, N. C., Hoseini, M. S., Yasar, T. B., & Wessel, R. (2017). Coupling of synaptic  
1249 inputs to local cortical activity differs among neurons and adapts after stimulus  
1250 onset. *Journal of Neurophysiology*, 118(6), 3345–3359.  
1251 <https://doi.org/10.1152/jn.00398.2017>

- 1252 Yu, J., Gutnisky, D. A., Hires, S. A., & Svoboda, K. (2016). Layer 4 fast-spiking  
1253 interneurons filter thalamocortical signals during active somatosensation. *Nature*  
1254 *Neuroscience*, 19(12), 1647–1657. <https://doi.org/10.1038/nn.4412>
- 1255 Yu, J., Hu, H., Agmon, A., Yu, J., Hu, H., Agmon, A., & Svoboda, K. (2019). Recruitment  
1256 of GABAergic Interneurons in the Barrel Cortex during Active Tactile Behavior  
1257 Article Recruitment of GABAergic Interneurons in the Barrel Cortex during Active  
1258 Tactile Behavior. *Neuron*, 1–16. <https://doi.org/10.1016/j.neuron.2019.07.027>
- 1259 Zheng, H. J. V., Wang, Q., & Stanley, G. B. (2015). Adaptive shaping of cortical  
1260 response selectivity in the vibrissa pathway. *Journal of Neurophysiology*, 113(10),  
1261 3850–3865. <https://doi.org/10.1152/jn.00978.2014>
- 1262 Zuo, Y., Safaai, H., Notaro, G., Mazzoni, A., Panzeri, S., & Diamond, M. E. (2015).  
1263 Complementary Contributions of Spike Timing and Spike Rate to Perceptual  
1264 Decisions in Rat S1 and S2 Cortex. *Current Biology*, 25(3), 357–363.  
1265 <https://doi.org/10.1016/j.cub.2014.11.065>
- 1266
- 1267
- 1268

1269 **Figure Captions**

1270

1271 **Figure 1. S1 exhibits sensory adaptation during wakefulness, and regular-spiking**  
1272 **neurons are more profoundly adapted than fast-spiking neurons.** A. Experimental  
1273 setup. We recorded in S1 of the awake, head-fixed mouse while presenting precise  
1274 single-whisker stimulation. “Sawtooth” punctate whisker deflections were delivered either  
1275 in isolation (control condition) or embedded in sensory white noise (adapted condition).  
1276 B. Top: Grand mean  $\pm$  SEM waveforms for all well-isolated fast-spiking (FS, blue, N =  
1277 95) and regular-spiking (RS, red, N = 119) significantly responsive single-units recorded  
1278 in S1 of awake mice (see Methods). Bottom: distribution of mean waveform widths (time  
1279 from trough to subsequent peak) for all units, with color denoting RS and FS designation.  
1280 C. Summed spiking activity of regular-spiking (RS, putative excitatory) and fast-spiking  
1281 (FS, putative inhibitory) from one example recording session. Each row indicates spike  
1282 times of all simultaneously-recorded RS (red) and FS (blue) neurons on a single trial. D.  
1283 Grand-average mean ( $\pm$  SEM) rates for spontaneous activity (i.e., no sensory  
1284 stimulation) and during the presentation of sensory white noise (with \*\*\* indicating  $p <$   
1285 0.001, Wilcoxon signed-rank test). RS: spontaneous rate = 6.0  $\pm$  0.59 Hz, white-noise-  
1286 evoked rate = 8.11  $\pm$  0.74 Hz, mean  $\pm$  SEM, 35.1% increase,  $p = 6.17 \times 10^{-8}$ , Wilcoxon  
1287 signed-rank test, N = 119 units from 19 recording sessions, FS: spontaneous rate = 12.28  
1288  $\pm$  1.22 Hz, white-noise-evoked rate = 26.1  $\pm$  2.73 Hz, mean  $\pm$  SEM, 112.6% increase,  
1289  $p = 2.41 \times 10^{-16}$ , Wilcoxon signed-rank test, N = 95 units from 19 sessions. E. Grand  
1290 PSTHs for all responsive RS (top, N = 119) and FS (bottom, N = 95) units, for two punctate  
1291 stimulus velocities. F. Across-neuron mean ( $\pm$  SEM) firing rates for all responsive  
1292 neurons, for 300 deg/s (left) and 900 deg/s (right) punctate stimuli (\*:  $0.01 \leq p < 0.05$ ; \*\*\*:  
1293  $p < 0.001$ , Wilcoxon signed-rank test). RS 300 deg/s mean  $\pm$  SEM control: 17.08  $\pm$   
1294 1.02, adapted: 11.36  $\pm$  1.01, 33.5% decrease,  $p = 1.03 \times 10^{-15}$ , Wilcoxon signed-rank  
1295 test, N = 119 units; 900 control: 17.19  $\pm$  1.25 Hz, adapted: 9.92  $\pm$  1.08 Hz, 42.3%  
1296 decrease,  $p = 1.47 \times 10^{-8}$ , N = 49 units from 8 sessions; FS: 300 deg/s control: 41.72  $\pm$   
1297 3.85 Hz, adapted: 34.1  $\pm$  3.39 Hz, 18.3% decrease  $p = 2.90 \times 10^{-8}$ , N = 95 units from 19  
1298 sessions; 900 deg/s control: 42.88  $\pm$  5.61 Hz, adapted: 40.03  $\pm$  6.43 Hz, 6.6%  
1299 decrease  $p = 0.19$ , N = 29 units from 8 sessions. G. Population median ( $\pm$  SEM)



1300 normalized adapted responses for all responsive RS (red) and FS (blue) neurons (see  
1301 Methods; \*\*\*:  $p < 0.001$ , Kruskal-Wallis test). RS 300 deg/s median normed adapted  
1302 response = 0.61, FS median normed adapted response = 0.77,  $p = 3.85 \times 10^{-5}$ , Kruskal-  
1303 Wallis test; 900 deg/s RS median normed adapted response = 0.47, FS median normed  
1304 adapted response = 0.87,  $p = 1.13 \times 10^{-4}$ . H. Population median normalized adapted  
1305 responses (+/- SEM) by binned cortical depth (see Methods).

1306

1307 **Figure 2. Adaptation reduces the theoretical detectability of punctate sensory**  
1308 **stimuli.** A. Schematic overview of signal detection theory. Theoretical detectability  
1309 depends on the degree to which the distributions for “stimulus” (i.e., sensory response  
1310 amplitudes, green) and “no-stimulus” (i.e., ongoing activity amplitudes, gray) overlap. B.  
1311 Generation of ongoing and evoked population activity distributions for one example  
1312 session (see Methods). For this session (representative of the average), adaptation  
1313 decreased the population response amplitude, increasing the overlap of the ongoing and  
1314 evoked distributions (right). C. Receiver operator characteristic (ROC) curves for  
1315 example session in (B), for the control (darker line) and adapted (lighter line) conditions,  
1316 and associated area under ROC curve (AUROC) values. D. Theoretical detectability  
1317 (AUROC) vs. stimulus condition for all awake sessions (\*\*\*:  $p < 0.001$ , Wilcoxon signed-  
1318 rank test). Control AUROC = 0.91 +/- 0.02, adapted AUROC = 0.76 +/- 0.02,  $p = 1.8 \times$   
1319  $10^{-4}$ , Wilcoxon signed-rank test, N = 19 recording sessions.

1320

1321 **Figure 3. Adaptation increases response latency and reduces pairwise**  
1322 **synchronous spiking in S1.** A. Calculation of response onset properties for example  
1323 RS unit. Spike trains for each trial were convolved with a Gaussian kernel and summed  
1324 across trials, resulting in a convolved spike count ( $\tilde{s}$ ), from which we calculated response  
1325 onset times ( $T_{\text{onset}}$ ) and max rate of change in  $\tilde{s}$  immediately after  $T_{\text{onset}}$  ( $\max d\tilde{s}/dt$ , see  
1326 Methods). B. Grand mean onset times for RS (red) and FS (blue) neurons, for control  
1327 and adapted responses to 300 deg/s stimulus (\*\*\*:  $p < 0.001$ ; single gray bar:  $p \geq 0.05$ ,  
1328 Wilcoxon signed-rank test, control vs. adapted). 300 deg/s RS mean +/- SEM control:  
1329  $T_{\text{onset}} = 8.81 \pm 0.53$  ms, adapted:  $15.31 \pm 0.98$  ms, 73.9% increase,  $p = 3.11 \times 10^{-11}$ ,



1330 Wilcoxon signed-rank test,  $N = 119$  units; FS control:  $T_{\text{onset}} = 6.69 \pm 0.37$  ms, adapted:  
1331  $8.95 \pm 0.7$  ms, 33.9% increase,  $p = 8.11 \times 10^{-7}$ ,  $N = 95$  units, Fig. 3B; 900 deg/s RS  
1332 control:  $T_{\text{onset}} = 7.89 \pm 0.49$  ms, adapted:  $11.36 \pm 1.07$  ms, 43.9% increase,  $p = 1.70 \times$   
1333  $10^{-5}$ ,  $N = 49$  units; FS control:  $T_{\text{onset}} = 5.67 \pm 0.29$  ms, adapted:  $6.27 \pm 0.63$  ms,  $p =$   
1334  $0.27$ . C. Illustration of synchronous spike-count calculation. The grand cross-  
1335 correlogram (CCG) was constructed using all valid pairs of simultaneously-recorded S1  
1336 units, then scaled by the number of contributing pairs, and shuffle-corrected (see  
1337 Methods). The synchronous spike count was the number of spikes in a  $\pm 7.5$  ms window  
1338 around zero lag. D. Grand RS-RS CCGs for responses to 300 deg/s stimulus, for the  
1339 control (dark red) and adapted (light red) conditions. Bands indicate 99.9% confidence  
1340 intervals (from re-sampling spikes with replacement, see Methods). E. Synchronous AP  
1341 counts for control and adapted responses, calculated from RS-RS grand CCGs in (D).  
1342 Error bars indicate 99.9% confidence intervals (from re-sampling spikes with  
1343 replacement, see Methods). RS-RS pairs: 300 deg/s mean  $\pm$  99.9% confidence interval  
1344 control: synch AP count =  $65.93 \pm 3.31$  spikes/pair, adapted:  $22.14 \pm 2.11$  spikes/pair,  
1345 66.4% decrease,  $p < 0.001$ ,  $N = 189$  valid pairs from 17 sessions; 900 deg/s control:  
1346  $135.64 \pm 7.53$  spikes/pair; adapted:  $25.67 \pm 3.65$  spikes/pair, 81.1% decrease,  $p <$   
1347  $0.001$ ,  $N = 55$  valid pairs from 6 sessions. F and G. Same as (D) and (E), but for valid  
1348 FS-FS pairs. FS-FS pairs: 300 deg/s control:  $253.47 \pm 8.64$  spikes/pair, adapted:  $173.73$   
1349  $\pm 7.56$  spikes/pair, 31.5% decrease,  $p < 0.001$ ,  $N = 118$  valid pairs from 17 sessions;  
1350 900 deg/s control:  $597.33 \pm 23.79$  spikes/pair; adapted:  $379.8 \pm 19.6$  spikes/pair,  
1351 36.4% decrease,  $p < 0.001$ ,  $N = 33$  valid pairs from 6 sessions, see Methods for definition  
1352 of “valid pairs”.

1353

1354 **Figure 4. S1 sensory responses are also adapted under anesthesia, but RS cells**  
1355 **are not differentially adapted.** A. Experimental setup. S1 sensory responses were  
1356 recorded in mice lightly-anesthetized with isoflurane (see Methods). B. Summed spiking  
1357 activity of regular-spiking (RS, putative excitatory) and fast-spiking (FS, putative  
1358 inhibitory) from one example recording session. Each row indicates spike times of all  
1359 simultaneously-recorded RS (red) and FS (blue) neurons on a single trial. C. Grand-

1360 average mean (+/- SEM) rates for spontaneous activity (i.e., no sensory stimulation) and  
1361 during the presentation of sensory white noise (with \*\*\* indicating  $p < 0.001$ , Wilcoxon  
1362 signed-rank test). RS: spontaneous rate = 2.31 +/- 0.37 Hz, white-noise-evoked rate =  
1363 3.77 +/- 0.4 Hz, mean +/- SEM, 63.4% increase,  $p = 2.44 \times 10^{-7}$ , Wilcoxon signed-rank  
1364 test, N = 46 units from 14 sessions, Fig. 2C; FS: spontaneous rate = 0.83 +/- 0.26 Hz,  
1365 white-noise-evoked rate = 6.29 +/- 0.92 Hz, mean +/- SEM, 657% increase,  $p = 5.60 \times$   
1366  $10^{-5}$ , N = 21 units from 14 sessions. D. Sensory response grand PSTHs for all responsive  
1367 RS (left, N = 46) and FS (right, N = 21) units recorded under anesthesia, for 300 deg/s  
1368 punctate stimulus velocity. Grand mean (+/- SEM) rates for cells contributing to PSTHs  
1369 in (D). RS mean +/- SEM control: 12.27 +/- 0.88 Hz, adapted: 7.75 +/- 1.01, 36.8%  
1370 decrease,  $p = 9.82 \times 10^{-5}$ ; FS control: 18.61 +/- 2.19 Hz, adapted: 11.94 +/- 2.61, 35.8%  
1371 decrease,  $p = 0.001$ . F. Population median (+/- SEM) normalized adapted responses  
1372 for all responsive RS (red) and FS (blue) neurons (see Methods). RS 300 deg/s median  
1373 normed adapted response = 0.54, FS median normed adapted response = 0.57,  $p = 0.91$ ,  
1374 Kruskal-Wallis test.

1375

1376 **Figure 5. Adaptation reduces tonic and burst firing rates, and synchronous spike**  
1377 **counts, in VPM sensory responses.** A. Experimental setup. We recorded extracellular  
1378 spiking in VPM of the awake mouse, primarily using high-density silicon probes (see  
1379 Methods). B. Top: summed spiking activity of all well-isolated, responsive, putative VPM  
1380 units (see Methods) from one example recording session. Each row indicates spike times  
1381 of all such simultaneously-recorded units on a single trial. C. Grand-average mean (+/-  
1382 SEM) rates for spontaneous activity (i.e., no sensory stimulation) and during the  
1383 presentation of sensory white noise (with \*\*\* indicating  $p < 0.001$ , Wilcoxon signed-rank  
1384 test). Mean +/- SEM spontaneous: rate = 10.5 +/- 1.29 Hz, white noise: rate = 15.58 +/-  
1385 2.5 Hz, 48.4% increase  $p = 9.63 \times 10^{-4}$ , Wilcoxon signed-rank test, N = 30 units from 9  
1386 recording sessions. D. Criteria for classification of putative tonic (black) and burst (red)  
1387 VPM spikes. E. Grand PSTHs for tonic (black) and burst (red) spikes from all putative  
1388 VPM neurons, for 300 deg/s punctate stimulus. F. Across-neuron mean (+/- SEM) firing  
1389 rates for all putative VPM neurons (\*\*:  $0.001 \leq p < 0.01$ ; \*\*\*:  $p < 0.001$ , Wilcoxon signed-

1390 rank test). tonic 300 deg/s mean +/- SEM rate control: 30.2 +/- 3.41 Hz, adapted: 24.32  
1391 +/- 2.92 Hz, 19.5% decrease, N = 30 units, p = 0.002, Wilcoxon signed-rank test; 900  
1392 control: 29.98 +/- 3.47 Hz, adapted: 26.87 +/- 3.18 Hz, N = 16 units, p = 0.22; burst: 300  
1393 deg/s control: 3.79 +/- 1.08, adapted: 1.37 +/- 0.73 Hz, 64.0% decrease, p = 6.21 x 10<sup>-4</sup>;  
1394 900 deg/s control: 5.75 +/- 3.13 Hz, adapted: 2.02 +/- 0.88, 64.9% decrease, p = 4.6 x 10<sup>-3</sup>.  
1395 <sup>3</sup>. G. Grand shuffle-corrected cross-correlograms for all simultaneously-recorded  
1396 putative VPM neurons, for the control (black) and adapted (gray) conditions. Bands  
1397 indicate 99.9% confidence intervals (from re-sampling spikes with replacement, see  
1398 Methods). H. Mean synchronous AP counts, calculated from CCGs in (G), with error  
1399 bars indicating 99.99% confidence intervals (\*\*\*: p < 0.001, re-sampling spikes with  
1400 replacement). 300 deg/s mean +/- 99.9% confidence interval control: synch AP count =  
1401 42.96 +/- 8.9 spikes/pair, adapted: 16.6 +/- 6.19 spikes/pair, 61.4% decrease, p < 0.001,  
1402 N = 48 valid pairs from 7 sessions; 900 deg/s control: 54.1 +/- 10.43 spikes/pair; adapted:  
1403 31.51 +/- 9.24 spikes/pair, 41.7% decrease, p < 0.001, N = 37 valid pairs from 3 sessions,  
1404 see Methods for definition of “valid pairs”

1405

1406 **Figure 6. Optogenetic elevation of baseline VPM firing rate does not adapt S1**  
1407 **sensory responses.** A. Experimental setup. We recorded extracellular spiking activity  
1408 from topographically-aligned VPM barreloids and S1 barrels in awake, head-fixed,  
1409 transgenic mice expressing Channelrhodopsin in VPM/VPI neurons (see Methods). B.  
1410 Summed spiking activity of all well-isolated, responsive putative VPM (top) and S1  
1411 (bottom) units from one example recording session. Each row indicates spike times of all  
1412 such simultaneously-recorded units in that brain region on a single trial. C. Grand mean  
1413 (+/- SEM) firing rates for spontaneous activity (“spont”), and during presentation of the  
1414 adapting sensory stimulus (“white noise”) and optogenetic depolarization of VPM (“LED”),  
1415 for VPM (top) and S1 (bottom; \*: 0.005 ≤ p < 0.025; \*\*: 5 x 10<sup>-4</sup> ≤ p < 5 x 10<sup>-3</sup>; \*\*\*: p < 5 x  
1416 10<sup>-4</sup>). VPM mean +/- SEM rate spontaneous: 7.68 +/- 1.1 Hz, white noise: 11.05 +/- 1.99  
1417 Hz, LED: 14.27 +/- 2.81 Hz, 44.0% increase spont vs. white noise, p = 0.011, Wilcoxon  
1418 signed-rank test, 85.9% increase spont vs. LED, p = 0.011, 29.2% increase white noise  
1419 vs. LED, p = 0.91, N = 20 units from six sessions; S1 spontaneous: 8.87 +/- 0.82 Hz,

1420 white noise: 16.32 +/- 2.05 Hz, LED: 10.03 +/- 1.05 Hz, 87.7% increase spont vs. white  
1421 noise,  $p = 5.05 \times 10^{-10}$ , 15.3% increase spont vs. LED,  $p = 0.11$ , spont vs. LED, 38.6%  
1422 decrease white noise vs. LED,  $p = 8.42 \times 10^{-5}$ ,  $N = 88$  units from six sessions. D. Left:  
1423 grand PSTHs for each stimulus condition, for VPm (top) and S1 (bottom). Right: Grand  
1424 mean (+/- SEM) firing rates for each condition. Asterisks as in (C). S1 mean +/- SEM  
1425 rate control: 27.33 +/- 2.61 Hz, adapted: 20.91 +/- 2.47 Hz, LED: 27.82 +/- 2.79 Hz, 23.5%  
1426 decrease control vs. adapted,  $p = 1.39 \times 10^{-9}$ , 1.76% increase control vs. LED,  $p = 0.89$ ,  
1427 Wilcoxon signed-rank test; VPm control: 29.12 +/- 4.82 Hz, adapted: 19.07 +/- 3.1 Hz,  
1428 LED: 36.44 +/- 5.35 Hz, 34.5% decrease control vs. adapted,  $p = 0.003$ , 25.16% increase  
1429 control vs. LED,  $p = 0.06$ . E. Top: Grand VPm CCGs for each stimulus condition. Bands  
1430 indicate 99.9% confidence intervals (re-sampling spikes with replacement (see Methods)).  
1431 Bottom: synchronous spike counts calculated from CCGs in (E, Top), for each stimulus  
1432 condition. Error bars indicate 99.9% confidence intervals (re-sampling spikes with  
1433 replacement (see Methods). Mean +/- 99.9% confidence interval synch AP count control:  
1434 47.14 +/- 11.0 spikes/pair, LED: 51.83 +/- 12.94 spikes/pair, adapted: 20.08 +/- 8.53  
1435 spikes/pair,  $p \geq 0.05$  control vs. LED,  $p < 0.001$  control vs. adapted, re-sampling spikes  
1436 with replacement,  $N = 36$  pairs from 19 units in five sessions.

1437

1438 **Figure 7. S1 responses to direct optogenetic stimulation of TC terminals are not**  
1439 **adapted by sensory white noise.** A. Experimental setup for extracellular recordings.  
1440 S1 spiking activity was recorded in mice lightly-anesthetized with isoflurane (see  
1441 Methods). These transgenic mice expressed Channelrhodopsin in VPm cell bodies,  
1442 axons, and thalamocortical (TC) axon terminals. An optic fiber positioned above the  
1443 cortical surface was used to deliver punctate optogenetic stimulation to TC terminals on  
1444 “punctate terminal” stimulation trials (see Methods). B. Grand PSTHs (using all sensory-  
1445 responsive single- and multi-units, see Methods) for punctate sensory (black, left) and  
1446 punctate terminal (blue, right) trials, for control (empty histogram) and adapted (filled  
1447 histogram) conditions. C. Across-unit mean (+/- SEM) punctate-stimulus-evoked firing  
1448 rates vs stimulus condition for all responsive single- and multi-units, for punctate sensory  
1449 (black, left) and punctate terminal (blue, right) stimuli. (\*\*\*:  $p < 0.001$ , Wilcoxon signed-

1450 rank test). Punctate sensory mean +/- SEM control: 18.38 +/- 1.27 Hz, adapted: 6.59 +/-  
1451 0.65 Hz, 64.17% decrease,  $p = 1.39 \times 10^{-12}$   $N = 71$  units, Wilcoxon signed-rank test.  
1452 Punctate terminal mean +/- SEM control: 11.7 +/- 0.95 Hz, adapted: 11.38 +/- 0.99 Hz,  
1453 2.75% decrease,  $p = 0.19$ . D. Distributions of normalized adapted responses for all valid  
1454 units (see Methods). Triangles at top denote population median values (\*\*\*:  $p < 0.001$ ,  
1455 Wilcoxon signed-rank test). Population median normalized adapted response = -0.29  
1456 punctate terminal trials, 0.96 punctate sensory trials,  $p = 3.12 \times 10^{-11}$ , Wilcoxon signed-  
1457 rank test. E. Left: experimental setup for in vivo S1 patch clamp recordings in lightly-  
1458 anesthetized transgenic mice. Right: Across-trial median membrane potential responses  
1459 to punctate sensory (black traces) and punctate terminal (blue traces) stimuli, for one  
1460 example S1 neuron. F. Properties of subthreshold responses to punctate sensory (left)  
1461 and punctate terminal (right) stimulation: subthreshold response amplitude (top), and time  
1462 from stimulus onset to peak subthreshold response ( $T_{peak}$ , center) for each of the four  
1463 recorded cells. Dark lines connecting pairs of data points indicate significant difference  
1464 across stimulus conditions ( $p < 0.05$ , Wilcoxon signed-rank test), and light lines indicate  
1465 non-significance.

1466

1467 **Figure 8. A thalamocortical network model identifies synchronous VPM spikes and**  
1468 **feedforward inhibition as key mechanisms underlying response adaptation.** A.  
1469 Model schematic (see Methods). B. Grand mean PSTHs for VPM spike times used to  
1470 stimulate the network (top) and network excitatory and inhibitory neurons, for the control  
1471 (empty PSTHs) and adapted (filled PSTHs) conditions. C. Population median normalized  
1472 adapted responses for both simulated stimulus velocities (see Methods). Error bars  
1473 indicate 95% confidence intervals from re-sampling with replacement. D. Grand exc-exc  
1474 (left) and inh-inh (right) CCGs for 200 randomly-selected pairs of network neurons, for the  
1475 control (dark line) and adapted (lighter line) conditions. CCGs normalized to max value  
1476 in control condition for visualization purposes. E. Top: grand CCGs for VPM inputs to  
1477 model in the control (dark line) and adapted (lighter line) conditions (corresponding to  
1478 PSTHs in B, top). Bottom: grand CCGs for VPM inputs in the control (dark line) and  
1479 “reduced synch” (lighter line) conditions, where the “reduced synch” condition results from

1480 manual changes to drawn VPm spike times (see Methods). F. Same as in B, but for  
1481 control and “reduced synch” simulations. G. Normalized “reduced synch” response for  
1482 simulations in (F). H. Same as in (D), but for simulations in (F). I. Model schematic for  
1483 “identical TC connectivity” network (see Results and Methods). J. Grand excitatory (top)  
1484 and inhibitory (bottom) PSTHs for “identical TC connectivity” network. K, L. Same as in  
1485 (G, H), but for “identical TC connectivity” network.

1486



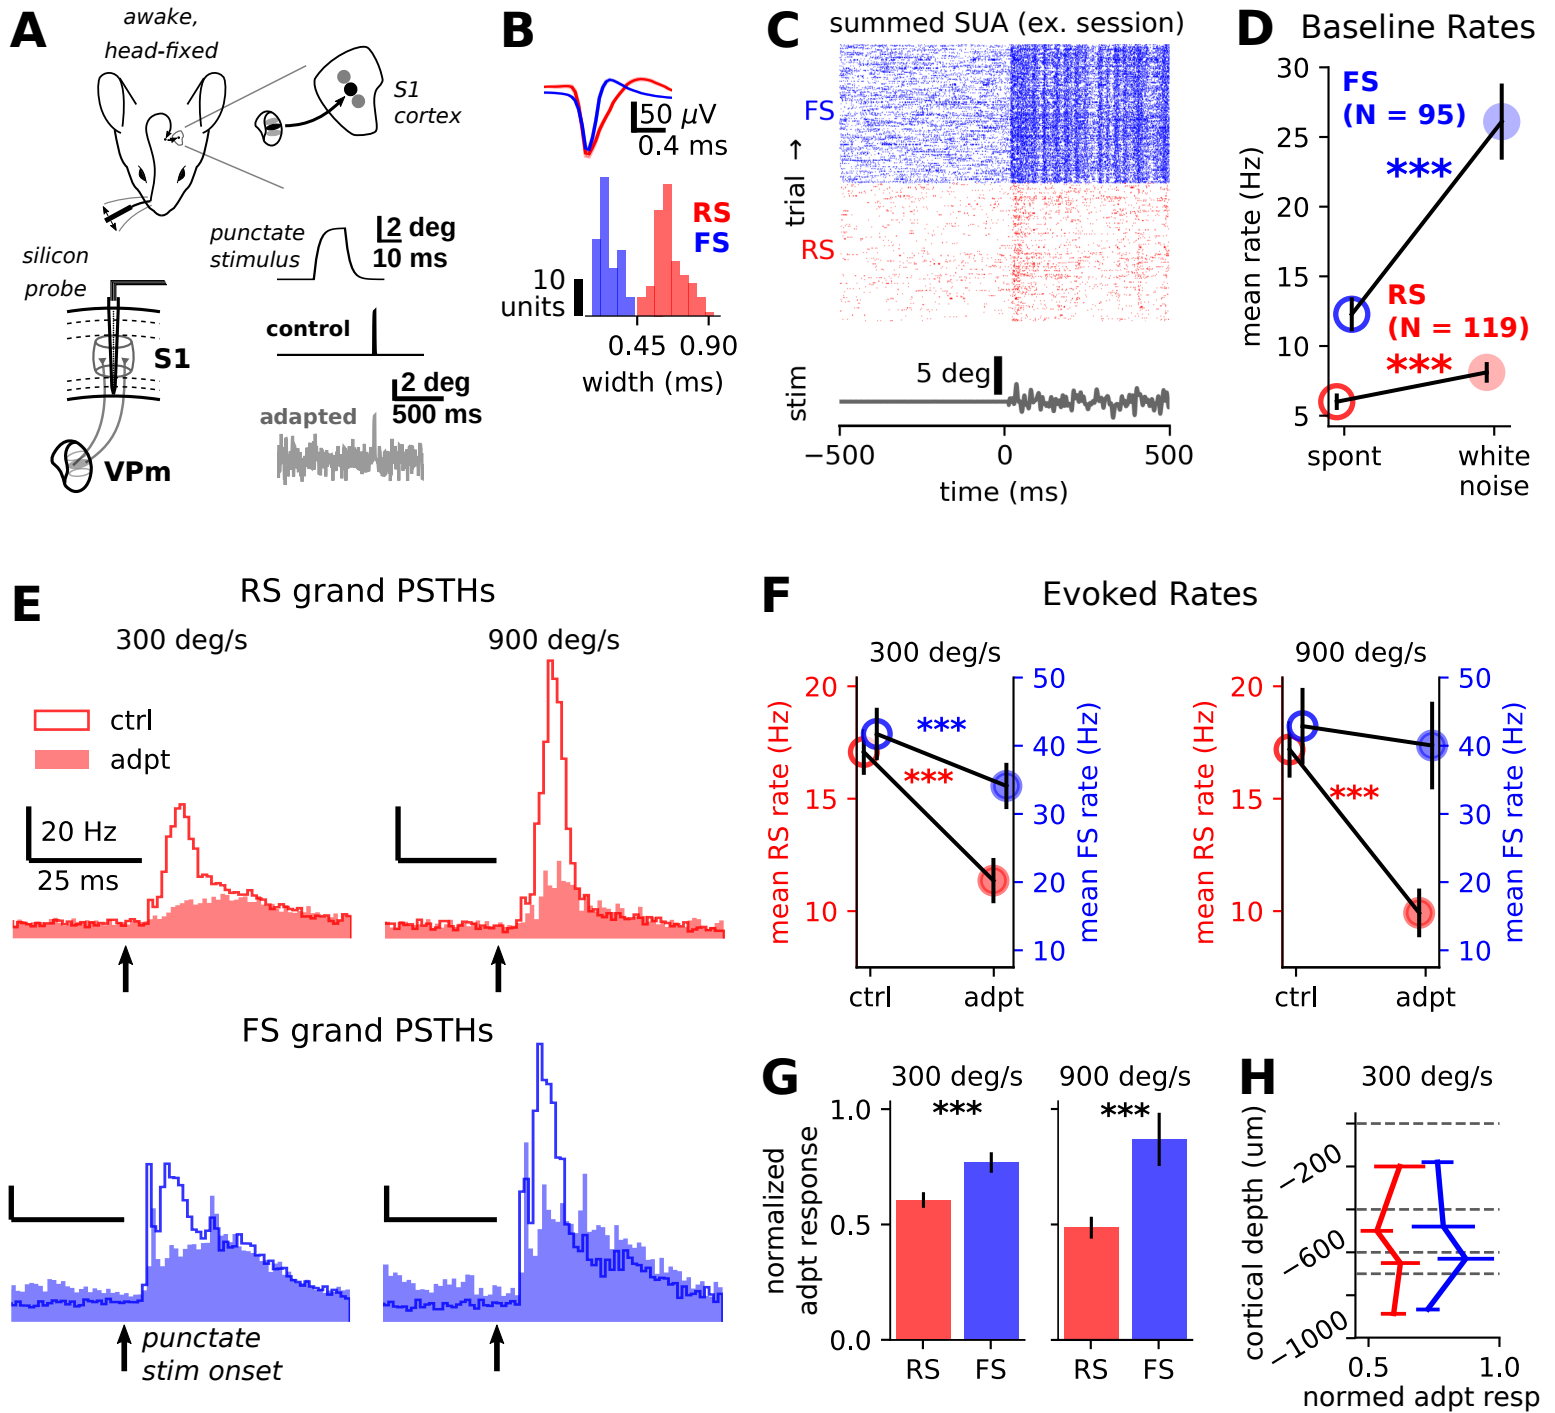

# Figure 2

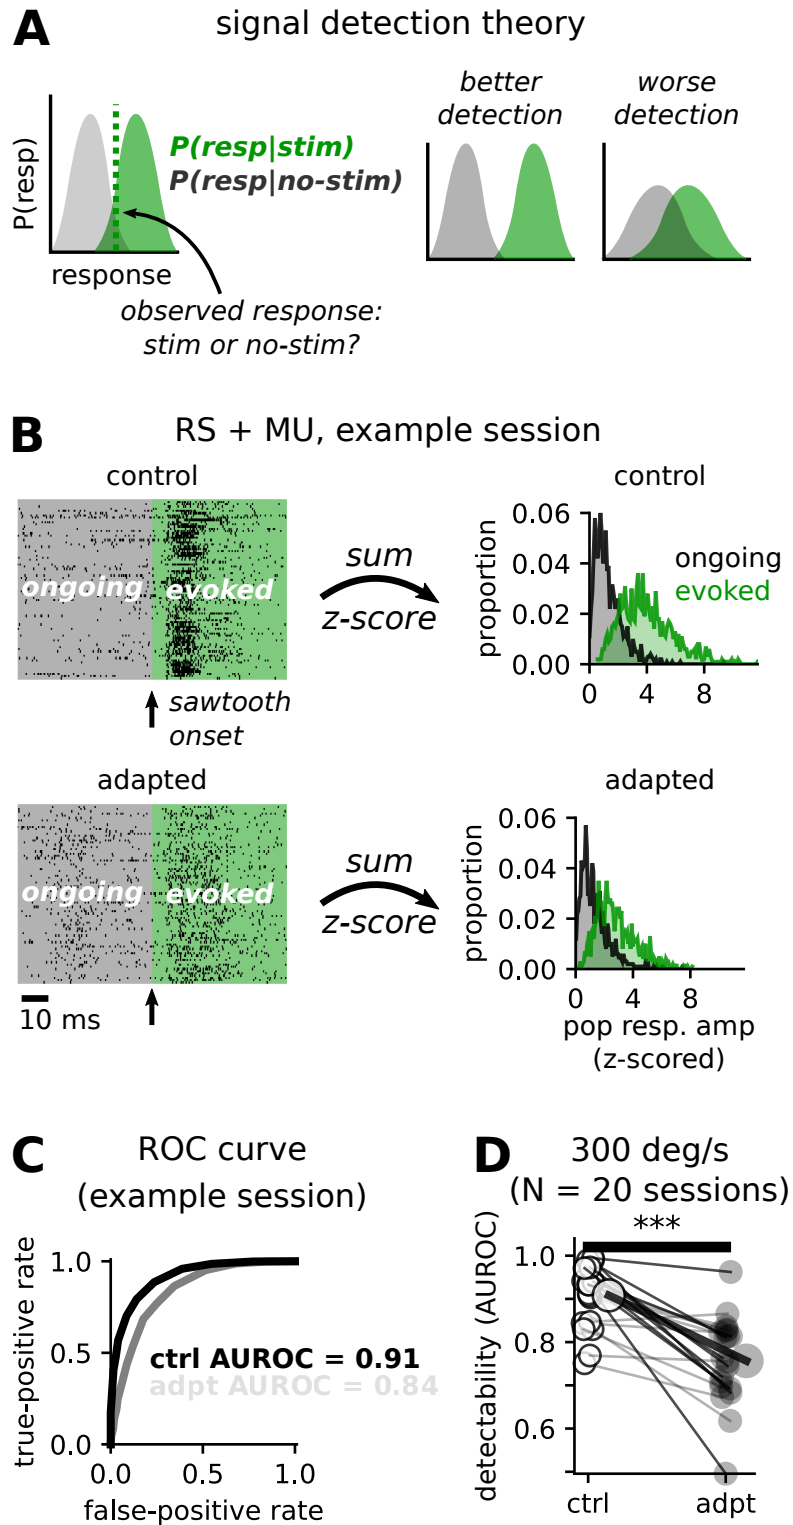

# Figure 3

bioRxiv preprint doi: <https://doi.org/10.1101/2020.10.08.331660>; this version posted October 8, 2020. The copyright holder for this preprint (which was not certified by peer review) is the author/funder, who has granted bioRxiv a license to display the preprint in perpetuity. It is made available under aCC-BY-ND 4.0 International license.

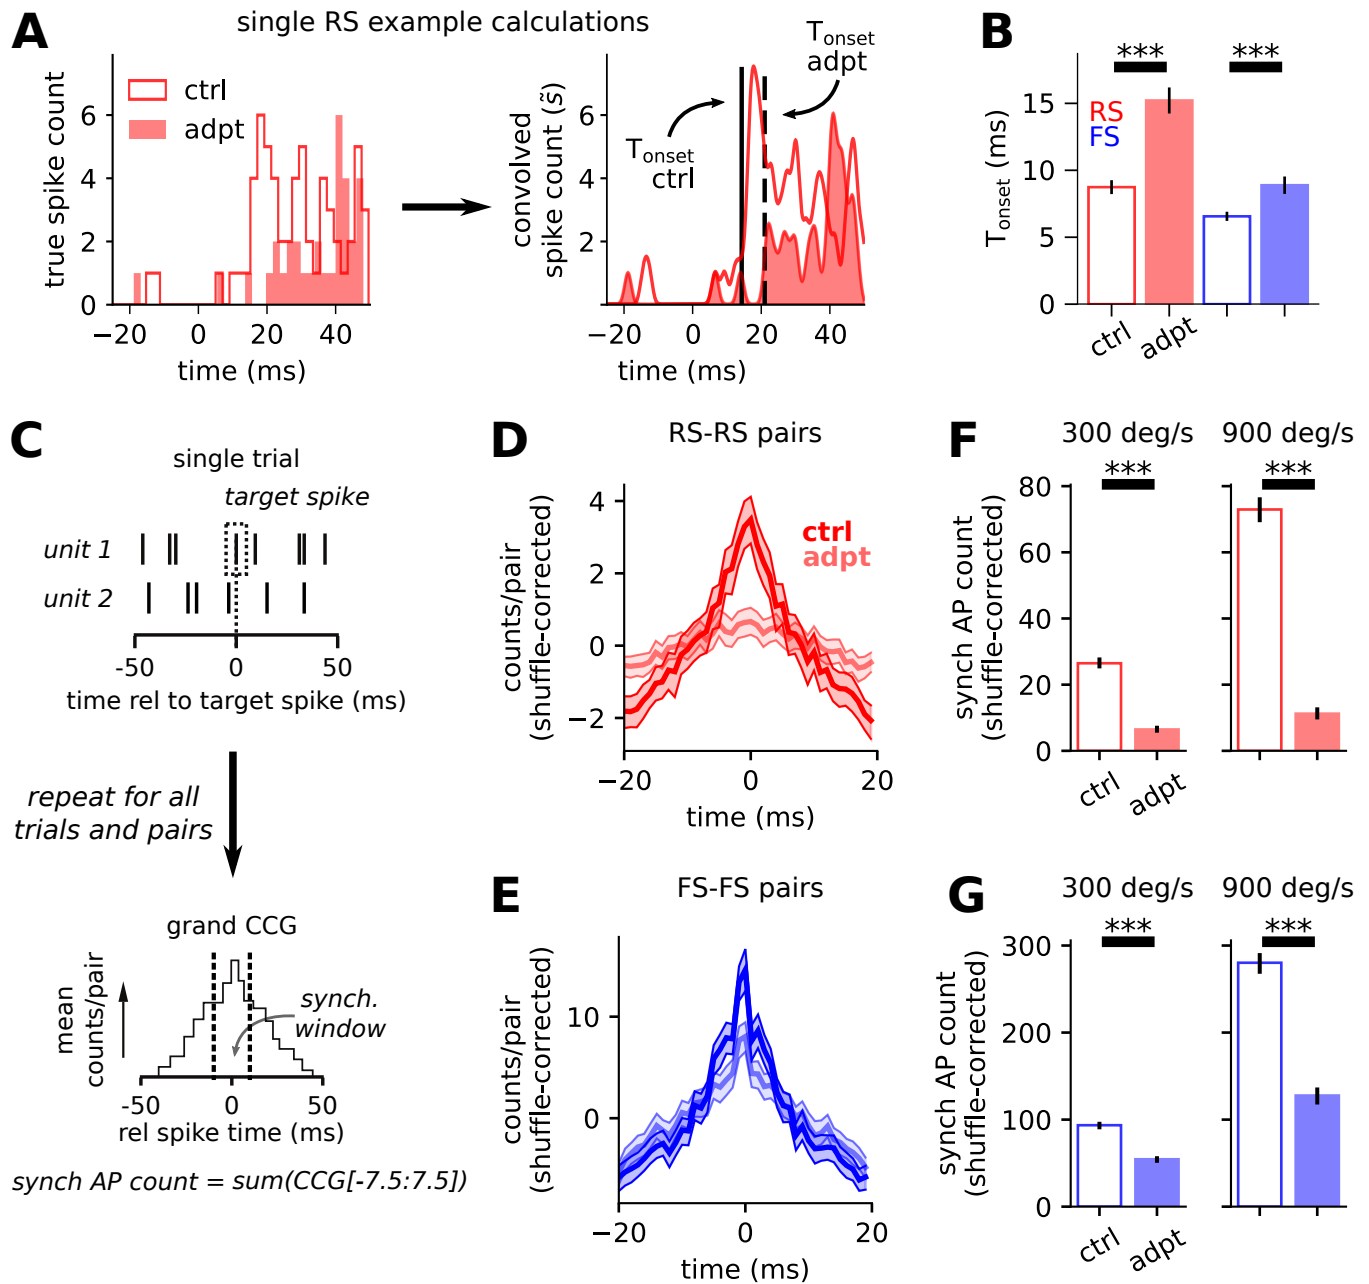

# Figure 4

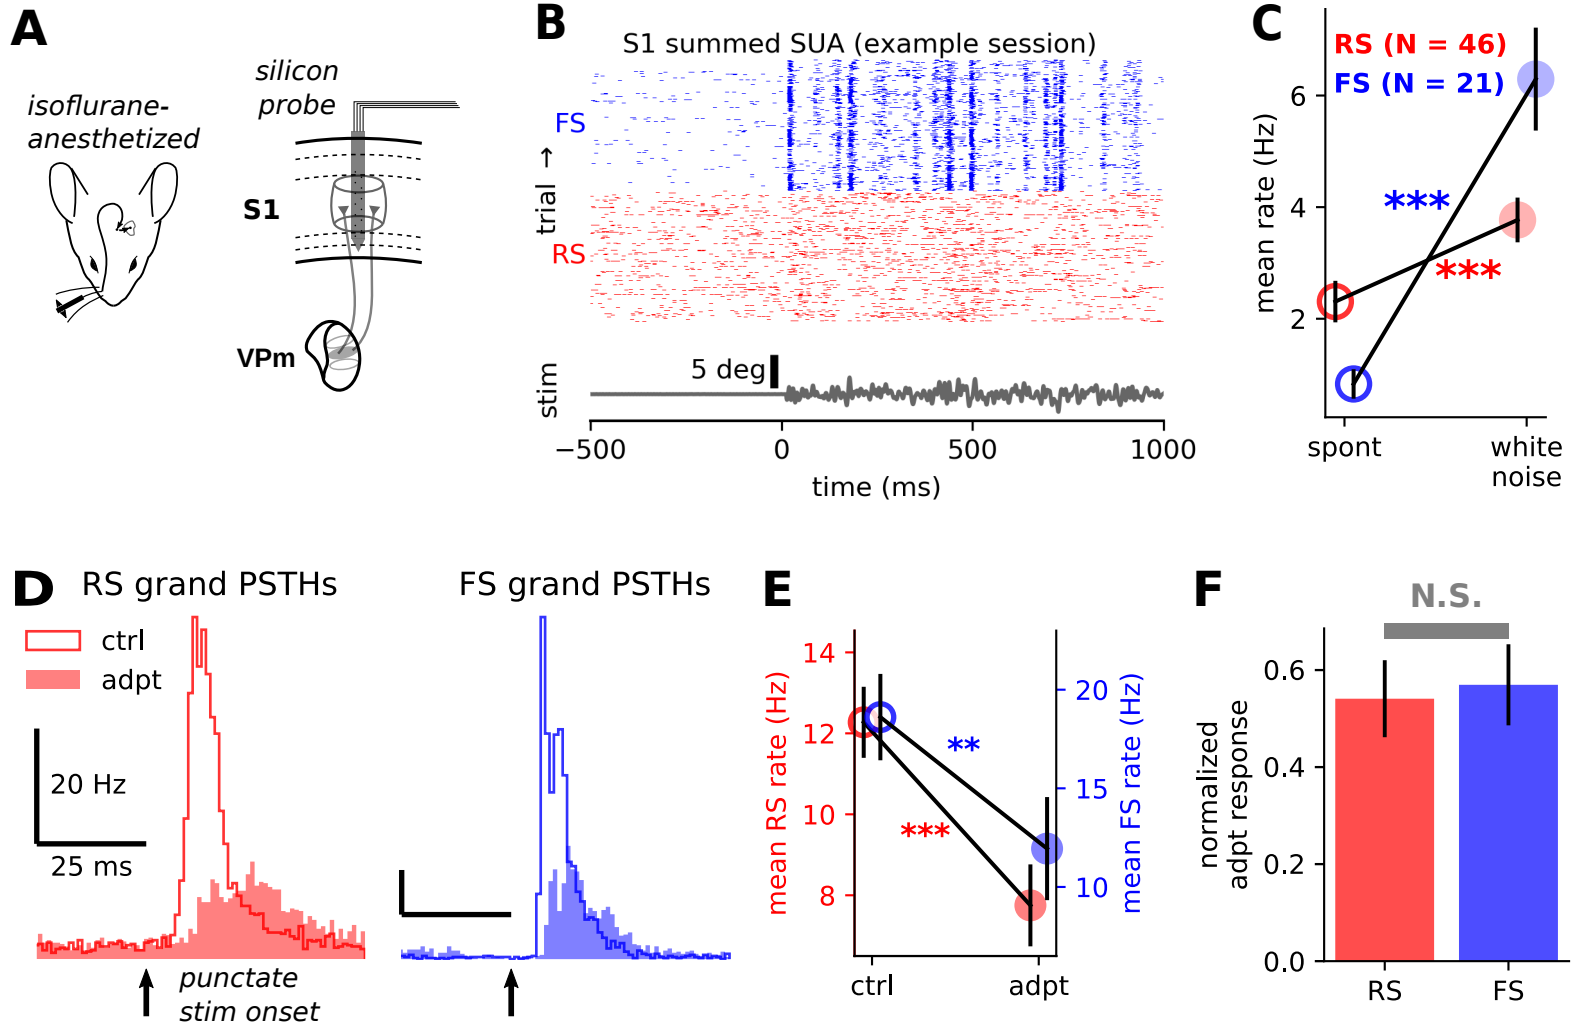

# Figure 5

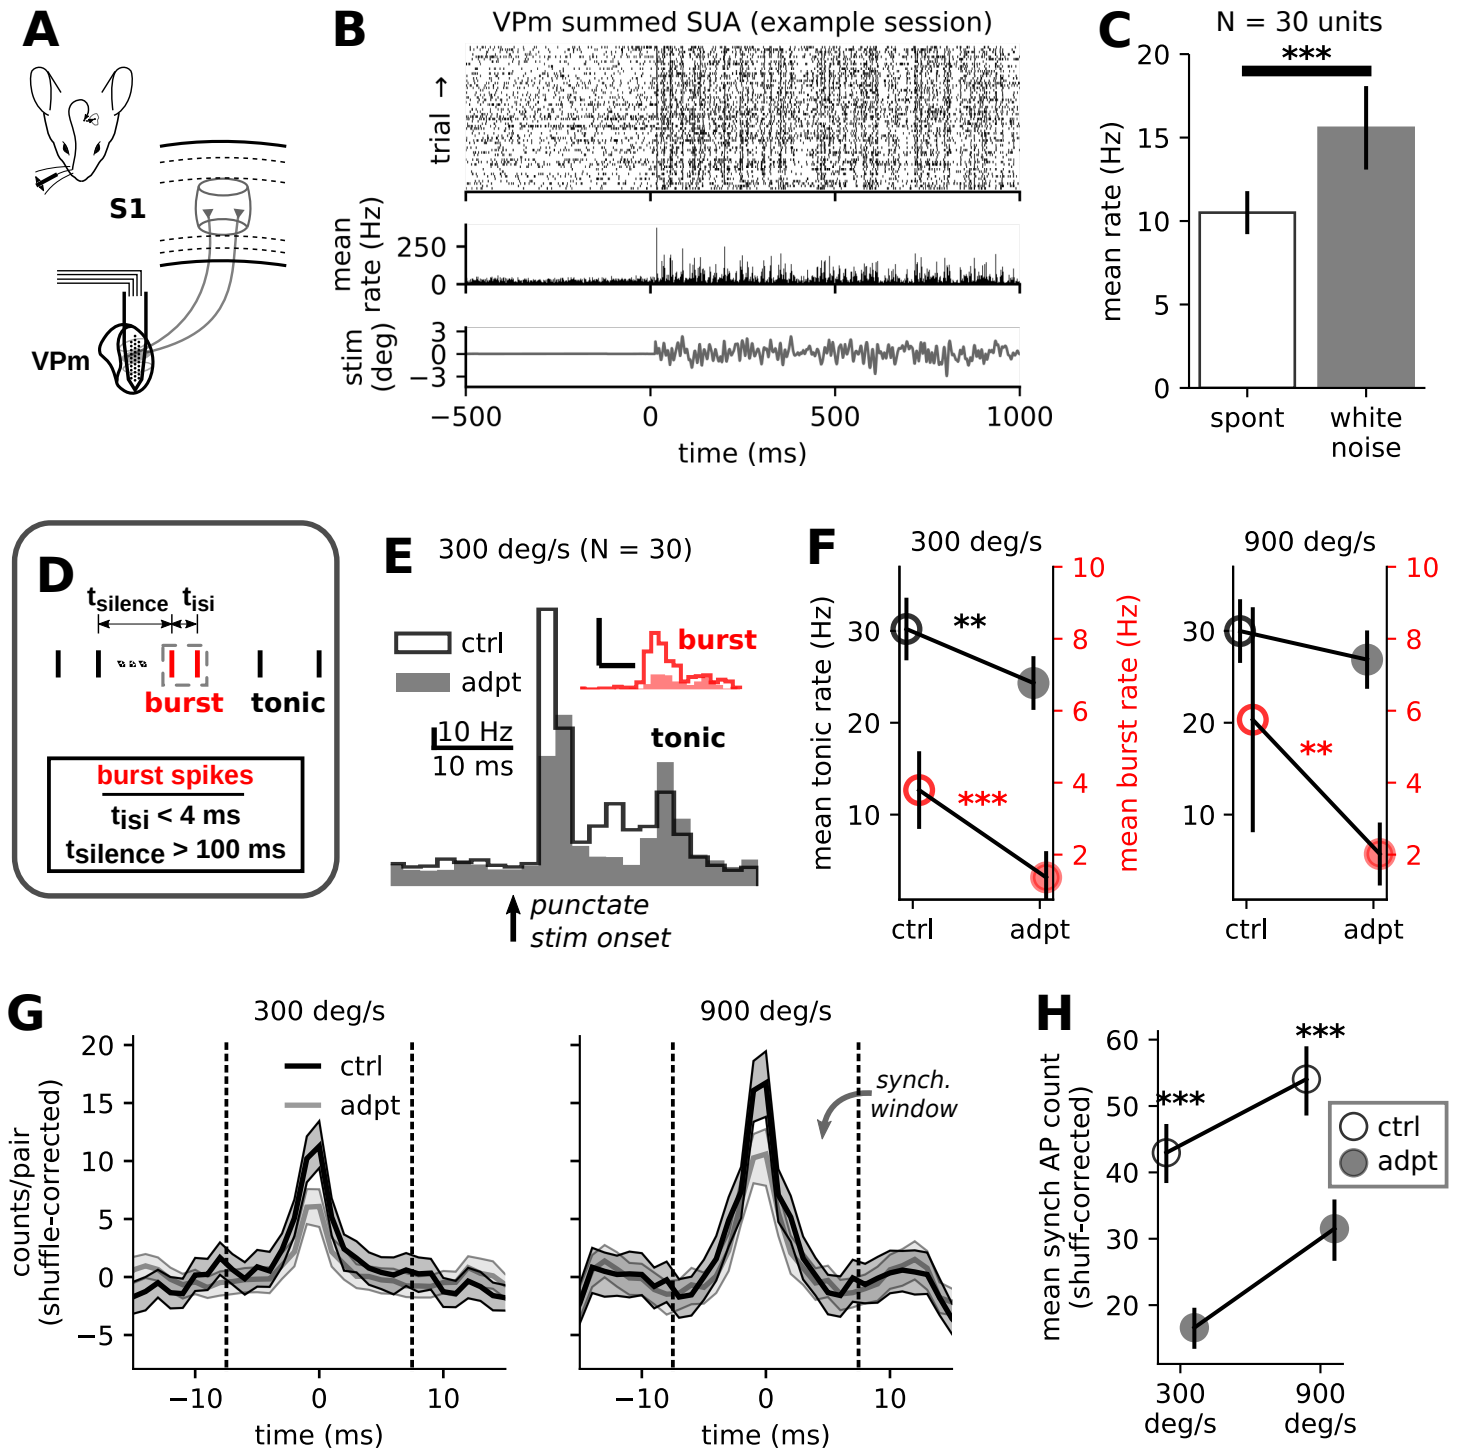

# Figure 6

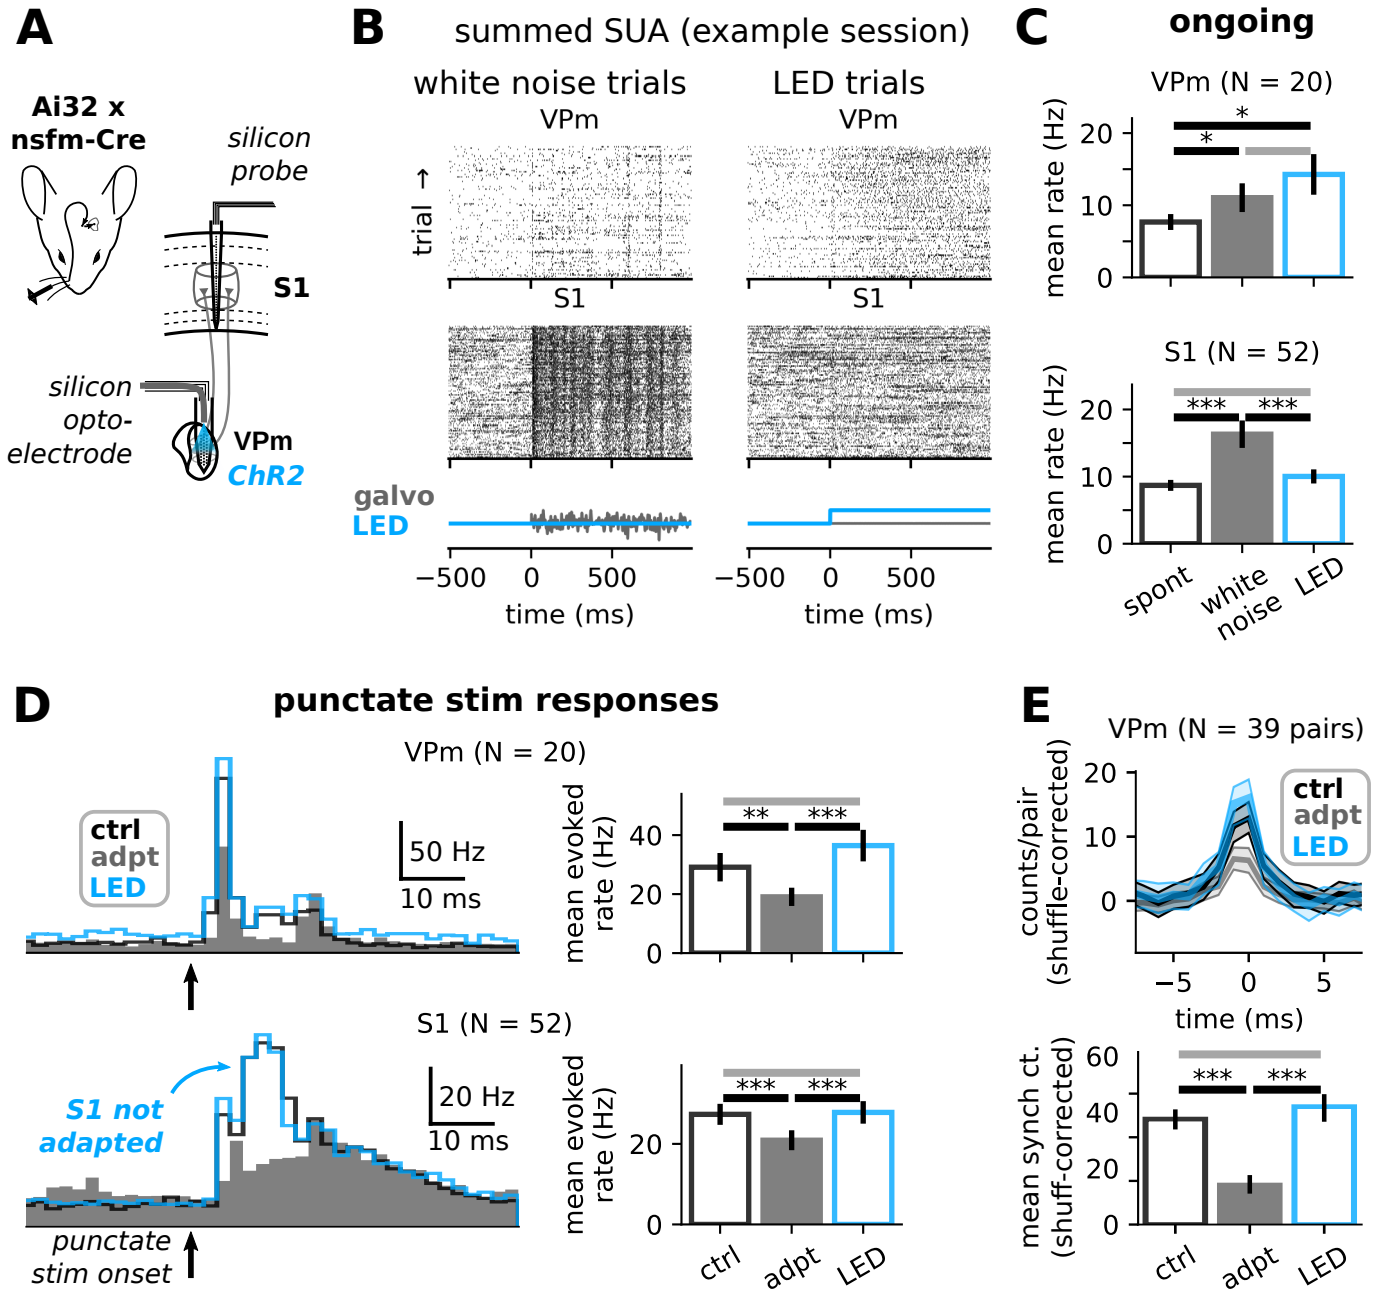



# Figure 7

bioRxiv preprint doi: <https://doi.org/10.1101/2020.10.08.331660>; this version posted October 8, 2020. The copyright holder for this preprint (which was not certified by peer review) is the author/funder, who has granted bioRxiv a license to display the preprint in perpetuity. It is made available under aCC-BY-ND 4.0 International license.

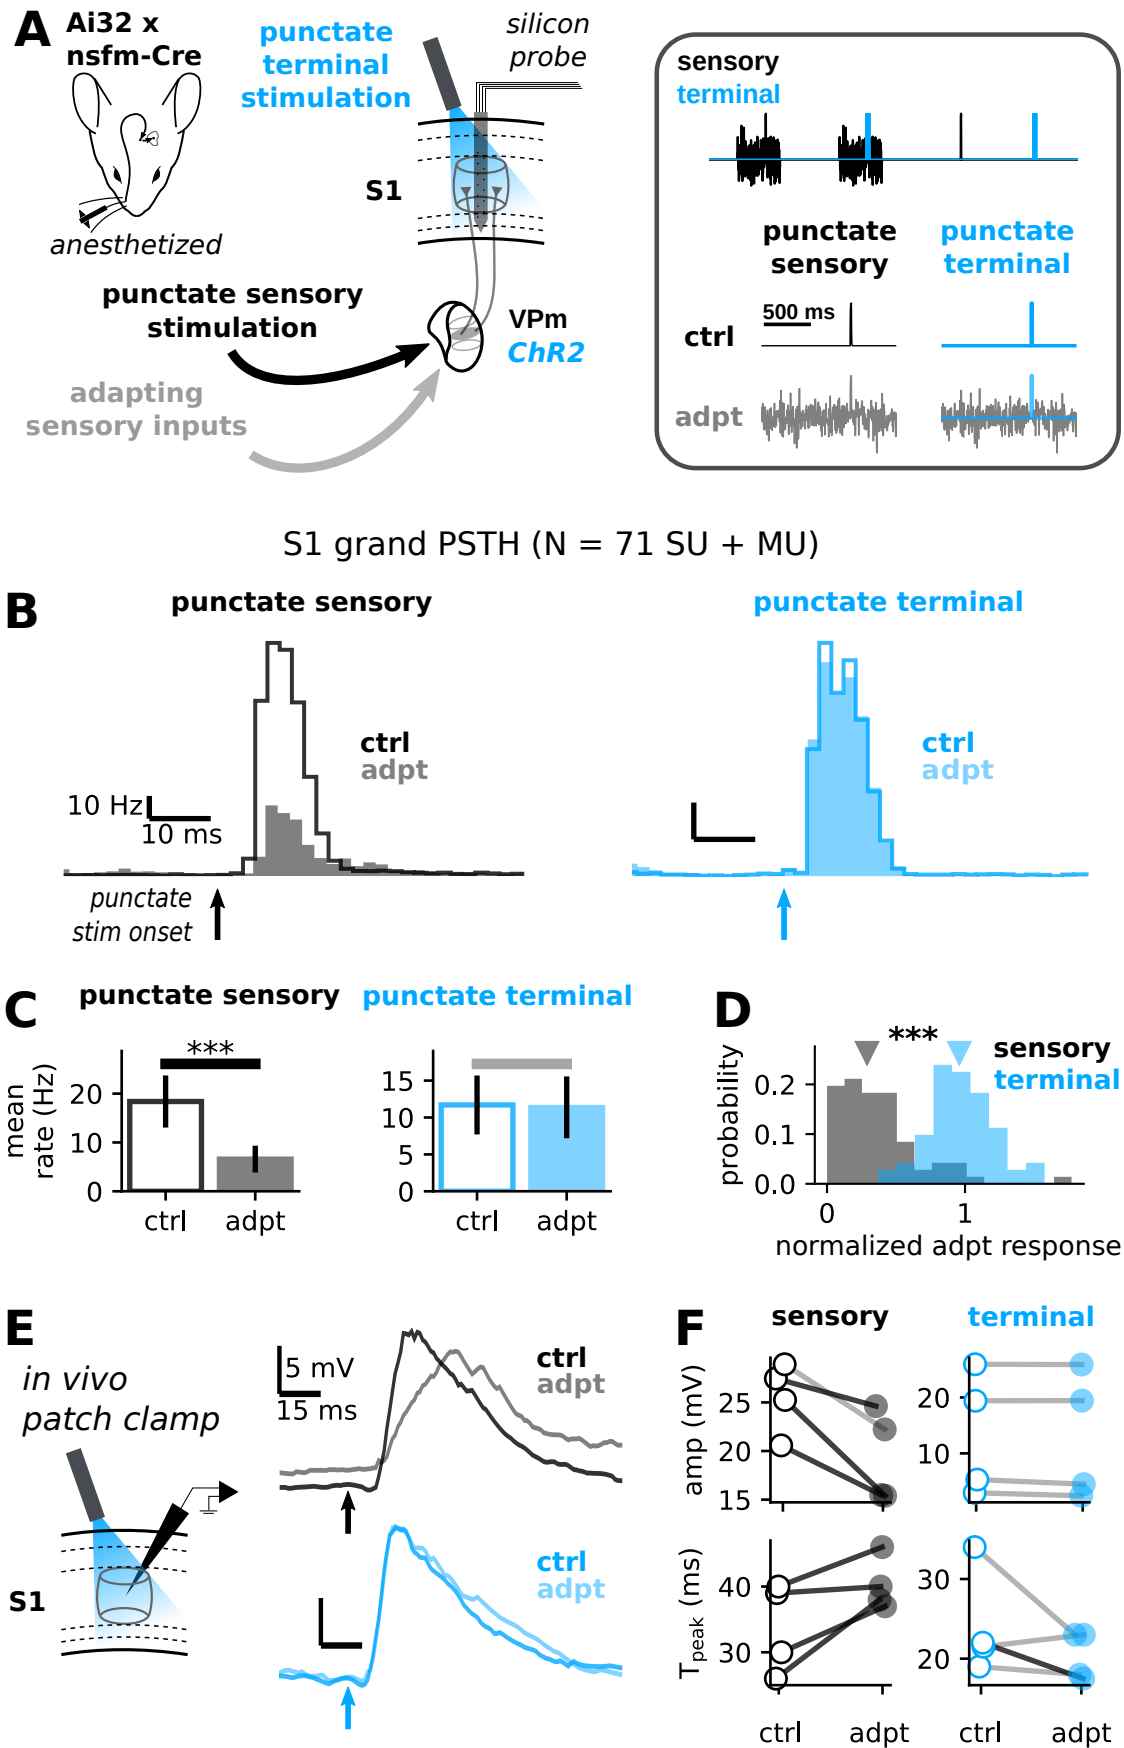

# Figure 8

**A**

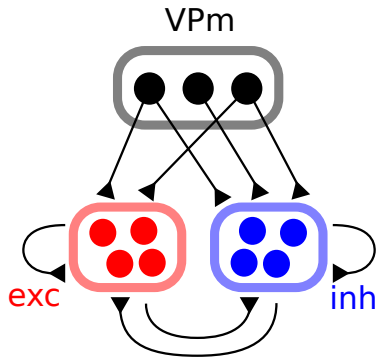

**B**

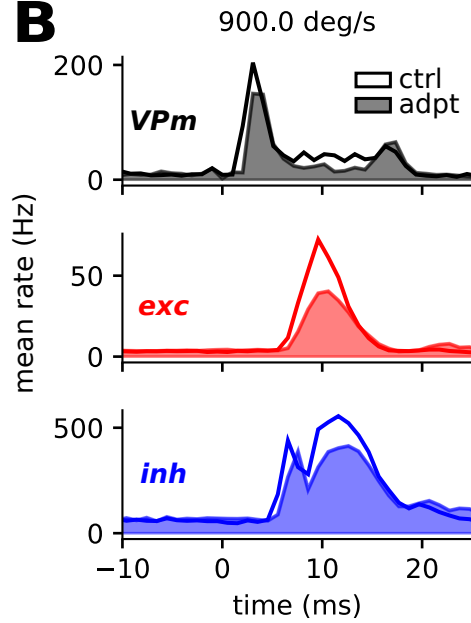

**C**

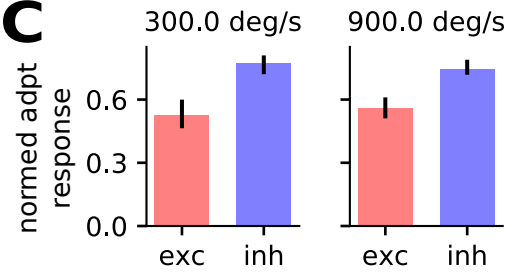

**D**

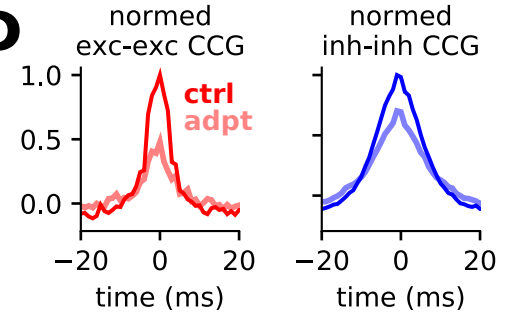

**E**

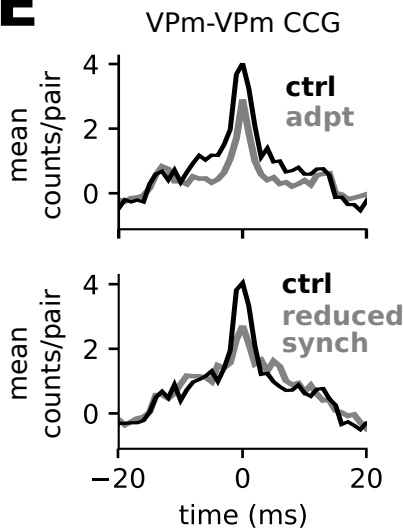

**F**

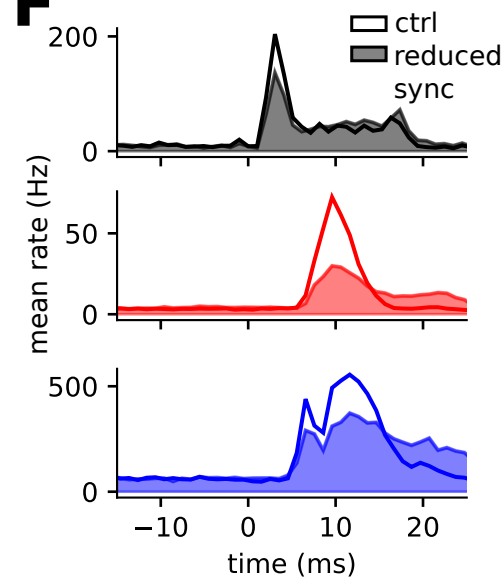

**G**

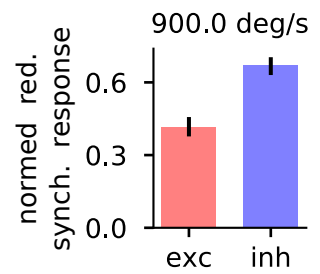

**H**

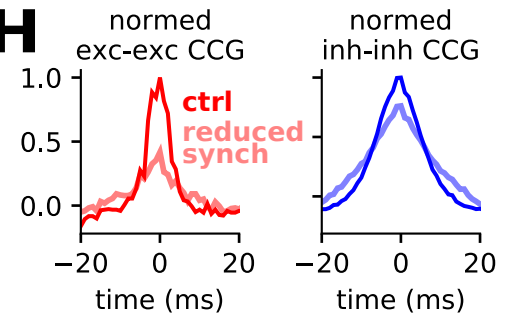

**I**

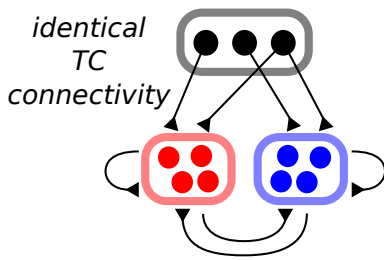

**J**

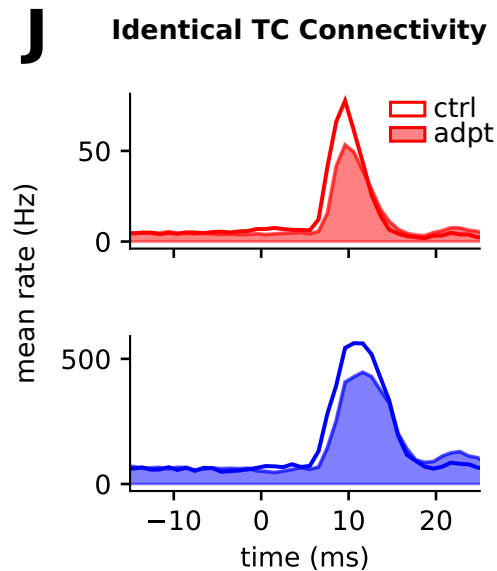

**K**

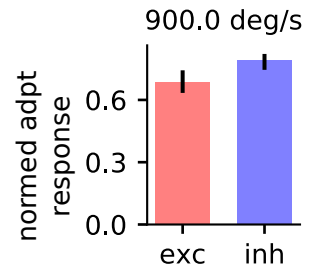

**L**

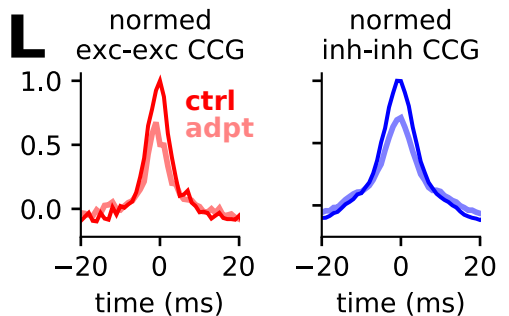

Source: https://www.biorxiv.org/content/10.1101/2020.10.08.331660v1.full.pdf
